# Supplementary material for: Rates and causes of mortality among children and young people with and without intellectual disabilities in Scotland: a record linkage cohort study of 796 190 school children
Source: PubMed Central journal article supplement (PMC7418667; doi:10.1136/bmjopen-2019-034077), 2020-08-09
Supplement: bmjopen-2019-034077.draft_revisions.pdf [file bmjopen-2019-034077.draft_revisions.pdf]

# BMJ Open

BMJ Open is committed to open peer review. As part of this commitment we make the peer review history of every article we publish publicly available.

When an article is published we post the peer reviewers' comments and the authors' responses online. We also post the versions of the paper that were used during peer review. These are the versions that the peer review comments apply to.

The versions of the paper that follow are the versions that were submitted during the peer review process. They are not the versions of record or the final published versions. They should not be cited or distributed as the published version of this manuscript.

BMJ Open is an open access journal and the full, final, typeset and author-corrected version of record of the manuscript is available on our site with no access controls, subscription charges or pay-per-view fees (<http://bmjopen.bmj.com>).

If you have any questions on BMJ Open's open peer review process please email [info.bmjopen@bmj.com](mailto:info.bmjopen@bmj.com)

# BMJ Open

## **Rates and causes of mortality among children and young people with intellectual disabilities in Scotland: a record linkage cohort study of 800,457 schoolchildren**

|                               |                                                                                                                                                                                                                                                                                                                                                                                                                                                                                                                                                          |
|-------------------------------|----------------------------------------------------------------------------------------------------------------------------------------------------------------------------------------------------------------------------------------------------------------------------------------------------------------------------------------------------------------------------------------------------------------------------------------------------------------------------------------------------------------------------------------------------------|
| Journal:                      | <i>BMJ Open</i>                                                                                                                                                                                                                                                                                                                                                                                                                                                                                                                                          |
| Manuscript ID                 | bmjopen-2019-034077                                                                                                                                                                                                                                                                                                                                                                                                                                                                                                                                      |
| Article Type:                 | Original research                                                                                                                                                                                                                                                                                                                                                                                                                                                                                                                                        |
| Date Submitted by the Author: | 04-Sep-2019                                                                                                                                                                                                                                                                                                                                                                                                                                                                                                                                              |
| Complete List of Authors:     | Smith, Gillian; University of Glasgow Institute of Health and Wellbeing<br>Fleming, Michael ; University of Glasgow, Institute of Health and Wellbeing<br>Kinnear, Deborah; University of Glasgow, Institute of Health and Wellbeing<br>Henderson, Angela; University of Glasgow, Institute of Health and Wellbeing<br>Pell, J. P.; University of Glasgow, Institute of Health and Wellbeing<br>Melville, Craig; University of Glasgow, Institute of Health and Wellbeing<br>Cooper, Sally-Ann; University of Glasgow, Institute of Health and Wellbeing |
| Keywords:                     | intellectual disabilities, mortality, death, children, young people                                                                                                                                                                                                                                                                                                                                                                                                                                                                                      |
|                               |                                                                                                                                                                                                                                                                                                                                                                                                                                                                                                                                                          |

SCHOLARONE™  
Manuscripts

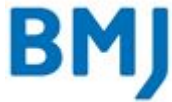

I, the Submitting Author has the right to grant and does grant on behalf of all authors of the Work (as defined in the below author licence), an exclusive licence and/or a non-exclusive licence for contributions from authors who are: i) UK Crown employees; ii) where BMJ has agreed a CC-BY licence shall apply, and/or iii) in accordance with the terms applicable for US Federal Government officers or employees acting as part of their official duties; on a worldwide, perpetual, irrevocable, royalty-free basis to BMJ Publishing Group Ltd ("BMJ") its licensees and where the relevant Journal is co-owned by BMJ to the co-owners of the Journal, to publish the Work in this journal and any other BMJ products and to exploit all rights, as set out in our [licence](#).

The Submitting Author accepts and understands that any supply made under these terms is made by BMJ to the Submitting Author unless you are acting as an employee on behalf of your employer or a postgraduate student of an affiliated institution which is paying any applicable article publishing charge ("APC") for Open Access articles. Where the Submitting Author wishes to make the Work available on an Open Access basis (and intends to pay the relevant APC), the terms of reuse of such Open Access shall be governed by a Creative Commons licence – details of these licences and which [Creative Commons](#) licence will apply to this Work are set out in our licence referred to above.

Other than as permitted in any relevant BMJ Author's Self Archiving Policies, I confirm this Work has not been accepted for publication elsewhere, is not being considered for publication elsewhere and does not duplicate material already published. I confirm all authors consent to publication of this Work and authorise the granting of this licence.

1  
2  
3 **Rates and causes of mortality among children and young people with**  
4 **intellectual disabilities in Scotland: a record linkage cohort study of 800,457**  
5 **schoolchildren**  
6  
7  
8  
9

10  
11  
12 **Smith, G.S., Fleming, M., Kinnear, D., Henderson, A., Pell, J.P., Melville, C., Cooper, S-A.**  
13  
14

15  
16 **Corresponding author: Professor Sally-Ann Cooper; Sally-Ann.Cooper@glasgow.ac.uk**  
17  
18

19  
20  
21  
22 **Abstract**  
23

24  
25 **Objectives:** To investigate mortality rates and causes in children and young people with intellectual  
26 disabilities.  
27

28  
29 **Design:** Retrospective cohort, with individual record-linkage between Scotland's annual pupil census  
30 and National Records of Scotland death register.  
31

32  
33 **Setting:** General community.  
34

35  
36 **Participants:** Pupils receiving Local Authority funded schooling in Scotland, 2008-2013, with an  
37 Additional Support Need due to intellectual disabilities, compared with other pupils.  
38

39  
40 **Main outcome measures:** Deaths up to 2015: age of death, age and sex-standardised mortality ratios  
41 (SMRs) and causes of death including cause and sex-specific age-SMRs.  
42

43  
44 **Results:** 18,595/1,016,868 (1.8%) pupils had intellectual disabilities. 106 died over 68,539 person-  
45 years (crude mortality rate=154/100,000 person-years), compared with 461 controls over 3,692,459  
46 person-years (crude mortality rate=13/100,000 person-years). Age-SMR was 12.1 (95% CI 10.0, 14.6);  
47 16.4 (12.0, 22.3) for female pupils, 9.6 (7.5, 12.2) for male pupils. Most common main underlying  
48 causes were diseases of the nervous system, then congenital anomalies; most common all-  
49 contributing causes were diseases of the nervous system, then respiratory system; most common  
50 specific contributing causes were cerebral palsy, pneumonia, respiratory failure, and epilepsy. For all  
51 contributing causes, SMR was 97.6 (69.0, 138.0) for congenital anomalies, 71.7 (55.2, 93.2) for nervous  
52 system, 62.9 (36.5, 108.4) for digestive system, 53.6 (41.2, 69.8) for respiratory system, 30.0 (16.6,  
53 54.1) for endocrine, 14.0 (8.5, 23.0) for circulatory system. External causes accounted for 46% of  
54  
55  
56  
57  
58  
59  
60

control deaths, but SMR was still higher (3.5 {2.2, 5.8}) for pupils with intellectual disabilities. Deaths amenable to good care were common.

**Conclusions:** Pupils with intellectual disabilities were much more likely to die than their peers, and had a different pattern of causes, including amenable deaths across a wide range of disease categories. Targeted improvements in care should be developed and delivered to reduce this inequality. Clinicians, carers, educators, and policy makers should be aware of mortality risks in order to make improvements.

### Strengths and limitations of this study

- Novel use of education records and record linkage to death records to study mortality in an unselected cohort of children and young people with intellectual disabilities
- Due to the use of a whole country population these results are well-powered and generalisable
- Despite comprising a whole country population, our study was not large enough to delineate cause-specific mortality ratios by gender
- This study was limited by lack of information on the severity or cause of intellectual disabilities
- Reliance on death certificate data is limited by inconsistencies in reporting of cause of death

### Key words

Intellectual disabilities, mortality, death, children, young people

## Introduction

Children and young people with intellectual disabilities have a much higher prevalence of physical and mental ill-health compared to the general population[1-3]. The life expectancy of people with intellectual disabilities has been reported to be about 20 years shorter than in the general population, or 28 years shorter specifically for people with Down syndrome[4-7]. While the actual number of deaths in childhood is smaller than in adults, mortality studies comparing people with intellectual disabilities with the general population have shown increased risk ratios in younger age groups compared to adults. However, the excess reported risk varies considerably between studies, and not all studies are comparable due to e.g. reporting deaths within different age ranges, and additionally some have small sample sizes and wide confidence intervals. Reported standardised mortality ratios (SMR) have ranged from 3.3 (95% confidence interval [CI] 2.1, 5.0) in young people aged 10-19 years[8], to 17.3 (95% CI 9.4, 29.0) in young people aged 10-17 years[9]; from 2.6 in males aged 2-19 years and 1.7 in females aged 2-19 years[10], to 21.6 (95% CI 10.8, 38.7) in males aged 0-19 years and 18.1 (95% CI 3.7, 53.0) in females aged 0-19 years[11], and have been reported to be 30.4 (95% CI 18.4, 47.5) in children aged 0-9 years[9]. Table 1 summarises previously reported SMRs in children and young people with intellectual disabilities.

**Table 1. Reported standardised mortality ratios for children and young people with intellectual disabilities**

| Author                           | Country             | SMR overall (95% confidence interval) at all ages                                                                                                                      | Number of deaths of children/young people                                                                | SMR for children/young people                                                                                                                                                                                                                                  |
|----------------------------------|---------------------|------------------------------------------------------------------------------------------------------------------------------------------------------------------------|----------------------------------------------------------------------------------------------------------|----------------------------------------------------------------------------------------------------------------------------------------------------------------------------------------------------------------------------------------------------------------|
| McGuigan et al (1995)[12]        | England             | -                                                                                                                                                                      | 18 aged 0-19 y                                                                                           | 1.7 (0.3, 4.9) for males aged 0-9 y*<br>3.1 (0.6, 9.0) for females aged 0-9 y*<br>17.1 (2.1, 61.8) for males aged 2-14 y*<br>20.7 (2.5, 74.7) for females aged 2-14 y*<br>22.2 (6.1, 56.8) for males aged 7-19 y*<br>34.0 (9.3, 87.1) for females aged 7-19 y* |
| Forsgren et al (1996)[13]        | Sweden              | 2.0 (1.7, 2.3)                                                                                                                                                         | 12 aged 0-19 y                                                                                           | 15.5 (10.2, 23.6) aged 0-19 y                                                                                                                                                                                                                                  |
| Decouflé & Autry (2002)[8]       | USA                 | -                                                                                                                                                                      | 23 aged 10-20 y                                                                                          | 3.3 (2.1, 5.0) aged 10-19 y<br>1.4 (0.6, 2.9) with mild ID aged 10-19 y<br>8.4 (4.8, 13.6) with severe ID aged 10-19 y                                                                                                                                         |
| Patja et al (2001)[10]           | Finland             | -                                                                                                                                                                      | 50 aged 2-19 y; 29 profound ID, 5 Severe ID, 7 moderate ID, 8 mild ID                                    | Death from disease: 2.6 for males, 1.7 for females aged 2-19 y<br>Accidental death: 0.1 for males, 0.1 for females aged 2-19 y                                                                                                                                 |
| Ouellette-Kuntz et al (2015)[11] | Canada              | 2.5 (2.1, 2.9)                                                                                                                                                         | 11 males aged 0-19 y<br>3 females aged 0-19 y                                                            | 21.6 (10.8, 38.7) for males aged 0-19 y<br>18.1 (3.7, 53.0) for females aged 0-19 y                                                                                                                                                                            |
| Arvio et al (2016)[14]           | Finland             | 2.3 (2.2, 2.4) for mild ID; 2.0 (1.9, 2.1) for males, 2.8 (2.6, 3.0) for females<br>3.4 (3.3, 3.5) for severe ID; 2.6 (2.5, 2.7) for males, 5.2 (5.0, 5.5) for females | 8 with mild ID aged 0-14 y;<br>4 males, 4 females<br>110 with severe ID aged 0-14 y; 42 males, 68 female | 4.2 (1.8, 8.3) with mild ID aged 0-14 y;<br>3.2 (0.9, 8.1) for males, 6.3 (1.7, 16.2) for females<br>13.3 (10.9, -) with severe ID aged 0-14 y;<br>8.2 (5.9, 11.1) for males, 21.4 (16.6, 27.1) for females                                                    |
| McCarron et al (2015)[15]        | Republic of Ireland | 3.9 (3.7, 4.0)                                                                                                                                                         | 272 aged 0-19 y                                                                                          | 6.9 (5.9, 7.5) aged 0-19 y                                                                                                                                                                                                                                     |
| Glover et al (2017)[9]           | England             | 3.2 (2.9, 3.4)                                                                                                                                                         | 33 aged 0-17 y                                                                                           | 30.4 (18.3, 47.5) aged 0-9 y<br>17.3 (9.4, 29.0) aged 10-17 y                                                                                                                                                                                                  |
| Bourke et al (2017)[16]          | Australia           | -                                                                                                                                                                      | 326 aged 1-27 y                                                                                          | aHR=6.0 (4.8, 7.6) aged 1-5 y<br>aHR=12.6 (9.0, 17.7) aged 6-10 y<br>aHR=4.9 (3.9, 6.1) aged 11-25 y                                                                                                                                                           |

aHR=adjusted hazard ratio; ID=intellectual disabilities; SMR=standardised mortality ratio; y=years; \*by individual birth cohorts

1  
2  
3 Most of these studies do not report causes of death among children and young people with intellectual  
4 disabilities. Bourke et al. (2017)[16] reported the most common causes of death in children, young  
5 people, and adults with intellectual disabilities aged 1-25 years to be respiratory infection (34%), with  
6 an additional 10% having an aspiration related cause, congenital heart defects (15%), and accidents  
7 (11%). Compared to children and young people who did not have intellectual disabilities, their causes  
8 of death by ICD 10 chapter were more likely to be attributed to the nervous system, endocrine,  
9 nutritional and metabolic diseases, or congenital malformations, and less likely to be attributed to  
10 conditions originating in the perinatal period, external causes, or injury or poisoning[16]. However, a  
11 small proportion of these deaths were among adults rather than children and young people, who may  
12 have a different cause of death profile. Patja et al. (2001)[10] reported respiratory diseases to be the  
13 most common underlying/immediate cause of death in children and young people with intellectual  
14 disabilities aged 2-19 years, with a relative risk of 5.8 (95% CI 4.4, 15.6) in males and 4.3 (0.3, 4.7) in  
15 females, and did not find any other causes (infectious diseases, tumours, vascular diseases, diseases  
16 of digestive system, accidents and poisonings, or other causes) to differ from those expected in the  
17 general population. However, the study was limited by small sample size. Durvasula et al. (2009)[17]  
18 reported 7 of 14 deaths among young people with intellectual disabilities aged 10-24 years were  
19 attributed to the respiratory system (pneumonia, aspiration).

20  
21  
22  
23  
24  
25  
26  
27  
28  
29  
30  
31  
32  
33  
34  
35  
36  
37  
38  
39  
40  
41  
42  
43  
44  
45  
46  
47  
48  
49  
50  
51  
52  
53  
54  
55  
56  
57  
58  
59  
60  
Adults with intellectual disabilities are over-represented in deaths which would have been amenable  
to treatment by timely and effective health care[4-5, 9]. However, there is limited evidence on  
whether children and young people with intellectual disabilities also experience such amenable deaths  
more commonly than other children and young people, as most authors who have reported cause-  
specific mortality do so grouped across all ages, due to sample sizes.

Overall, studies on mortality in children with intellectual disabilities are few in number, mostly small  
in size, and results are variable, and they do not report on causes of death. Hence, the aim of this  
longitudinal cohort study is to compare all-cause and cause-specific mortality in Scotland's school-  
aged population with and without intellectual disabilities.

## 51 **Methods**

52  
53  
54  
55  
56  
57  
58  
59  
60  
We used education data from Scotland's annual pupil census between 2008 and 2013, to establish a  
cohort of children and young people with and without intellectual disabilities. We used individual  
record linkage to the National Records for Scotland (NRS) deaths registry, to ascertain all deaths up to  
February 2015 in Scotland.



1  
2  
3 The Scottish annual pupil census is completed in September each year and provides information on  
4 all children attending Local Authority funded primary, secondary, and special schools in Scotland, or  
5 funded placements in alternative schools, which includes 95% of the entire population of children and  
6 young people in Scotland. This information includes whether the child has a record of Additional  
7 Support Needs, and the type of Additional Support Need. It is held by the Scottish exchange of  
8 education data (ScotXed).  
9

10  
11  
12  
13  
14 We excluded non-singleton births (available for Scottish-born pupils only, identified from linkage to  
15 maternity records). We included all pupils with records of Additional Support Need due to intellectual  
16 disabilities between 2008 and 2013, between the ages 4 and 19 years old. Only pupils with intellectual  
17 disabilities recorded in at least two different school years were included in the intellectual disabilities  
18 group. Pupils who were included in at least two pupil censuses over the study period and had no  
19 record of intellectual disabilities or autism were used as the comparison group. Pupils with autism  
20 were also excluded from controls, due to high comorbidity with intellectual disabilities.  
21  
22  
23  
24  
25

26 The pupil census also includes data on age, gender, ethnicity and Scottish Index of Multiple  
27 Deprivation 2012 (SIMD)[18]. Derived from individual pupil postcode of residence, SIMD is a  
28 composite of seven indices to indicate the extent of neighbourhood deprivation. SIMD was divided  
29 into quintiles according to the general population. Data on disability requirements including physical  
30 (e.g. visual, hearing, or physical impairments), communication, or curriculum needs are also listed.  
31  
32  
33  
34

35 Explorative statistical analysis using t-tests and  $\chi^2$ -tests were employed to investigate characteristics  
36 of pupils with intellectual disabilities compared to their peers in the comparison group. Differences in  
37 age of death were explored using t-tests. Crude mortality rates were calculated. Since only those  
38 pupils who attended school in at least two of the years over our observed study period were eligible,  
39 the entry to the study was defined as the date of their second pupil census record to account for  
40 immortal time bias in the first year. The mortality rates were indirectly standardised for both males  
41 and females using the expected age-specific mortality rates derived from the comparison group to  
42 calculate age-standardised mortality ratios (SMRs). SMRs were subsequently stratified by age, into  
43 childhood (aged 5-14 years) and young people (aged  $\geq 15$  years), and by sex. The SMRs were also re-  
44 calculated to exclude deaths from external causes. This was to investigate whether the over-  
45 representation of female deaths in people with intellectual disabilities compared to the general  
46 population[14-16] is related to the large proportion of male deaths from external causes in the general  
47 population[19].  
48  
49  
50  
51  
52  
53  
54  
55  
56

57 For cause of death analyses, the underlying cause of death is defined internationally[20] as the disease  
58 or injury which initiated the chain of morbid events leading directly to death, or the accident/act which  
59  
60

1  
2  
3 produced the fatal injury. We also used a broader definition to analyse all-contributing causes, that  
4 included all deaths with any mention on the death certificate related to the cause, combining both  
5 the underlying cause, with secondary, or contributing factors. While the same ICD 10 codes are used,  
6 it is important to note that one death may have several other, additional causes as contributing  
7 factors, all of which are counted in figures reporting “all-contributing causes”.

8  
9  
10  
11  
12 For the underlying causes of death, the total number of deaths in each ICD 10 chapter were collated,  
13 and this was then repeated for specific causes listed within chapters. Any errors or ambiguous deaths  
14 were listed as an unknown cause. All deaths where the underlying cause was ill-defined, as defined in  
15 ICD 10[20], listed as ICD10 codes “R00-R94” “R95-R99”, were also re-classified as “unknown”. Next,  
16 the breakdown of all-contributing causes were analysed, by collating number of deaths in each ICD 10  
17 chapter. Indirect age-standardisation of cause-specific mortality ratios was carried out using 5-year  
18 age-bands, except for categories that had fewer than ten deaths.

19  
20  
21  
22  
23  
24  
25 The Office of National Statistics (ONS) revised definition of avoidable mortality for children and young  
26 people[21] defined avoidable mortality as either amenable mortality (avoidable through good quality  
27 healthcare even after a condition has developed) or preventable mortality (avoidable through  
28 incidence reduction via public health interventions) or both. This list of ICD 10 causes was used to  
29 determine the occurrence of avoidable deaths. The rates and age-standardised mortality ratios (age-  
30 standardised using 5-year age-bands) for avoidable, amenable, and preventable mortality were  
31 calculated, except where there were for fewer than ten deaths per chapter. In keeping with the ONS  
32 avoidable mortality methodology[22], avoidable mortality rates based on fewer than twenty deaths  
33 were labelled as unreliable.

34  
35  
36  
37  
38  
39  
40 All statistical analyses were undertaken using Stata, version 15.0 (StataCorp).

#### 41 42 43 *Personal and Patient involvement*

44  
45 This study was undertaken in the Scottish Learning Disabilities Observatory due to the growing  
46 concern among people with intellectual disabilities and their families around mortality. Its steering  
47 group includes people with intellectual disabilities, and partners from third sector organisations.  
48 Results from this study will be disseminated to people with intellectual disabilities and their families  
49 in an easy-read version via the Scottish Learning Disabilities Observatory website and newsletters.

#### 50 51 52 **Results**

53  
54  
55  
56  
57  
58  
59  
60  
61  
62  
63  
64  
65  
66  
67  
68  
69  
70  
71  
72  
73  
74  
75  
76  
77  
78  
79  
80  
81  
82  
83  
84  
85  
86  
87  
88  
89  
90  
91  
92  
93  
94  
95  
96  
97  
98  
99  
100  
101  
102  
103  
104  
105  
106  
107  
108  
109  
110  
111  
112  
113  
114  
115  
116  
117  
118  
119  
120  
121  
122  
123  
124  
125  
126  
127  
128  
129  
130  
131  
132  
133  
134  
135  
136  
137  
138  
139  
140  
141  
142  
143  
144  
145  
146  
147  
148  
149  
150  
151  
152  
153  
154  
155  
156  
157  
158  
159  
160  
161  
162  
163  
164  
165  
166  
167  
168  
169  
170  
171  
172  
173  
174  
175  
176  
177  
178  
179  
180  
181  
182  
183  
184  
185  
186  
187  
188  
189  
190  
191  
192  
193  
194  
195  
196  
197  
198  
199  
200  
201  
202  
203  
204  
205  
206  
207  
208  
209  
210  
211  
212  
213  
214  
215  
216  
217  
218  
219  
220  
221  
222  
223  
224  
225  
226  
227  
228  
229  
230  
231  
232  
233  
234  
235  
236  
237  
238  
239  
240  
241  
242  
243  
244  
245  
246  
247  
248  
249  
250  
251  
252  
253  
254  
255  
256  
257  
258  
259  
260  
261  
262  
263  
264  
265  
266  
267  
268  
269  
270  
271  
272  
273  
274  
275  
276  
277  
278  
279  
280  
281  
282  
283  
284  
285  
286  
287  
288  
289  
290  
291  
292  
293  
294  
295  
296  
297  
298  
299  
300  
301  
302  
303  
304  
305  
306  
307  
308  
309  
310  
311  
312  
313  
314  
315  
316  
317  
318  
319  
320  
321  
322  
323  
324  
325  
326  
327  
328  
329  
330  
331  
332  
333  
334  
335  
336  
337  
338  
339  
340  
341  
342  
343  
344  
345  
346  
347  
348  
349  
350  
351  
352  
353  
354  
355  
356  
357  
358  
359  
360  
361  
362  
363  
364  
365  
366  
367  
368  
369  
370  
371  
372  
373  
374  
375  
376  
377  
378  
379  
380  
381  
382  
383  
384  
385  
386  
387  
388  
389  
390  
391  
392  
393  
394  
395  
396  
397  
398  
399  
400  
401  
402  
403  
404  
405  
406  
407  
408  
409  
410  
411  
412  
413  
414  
415  
416  
417  
418  
419  
420  
421  
422  
423  
424  
425  
426  
427  
428  
429  
430  
431  
432  
433  
434  
435  
436  
437  
438  
439  
440  
441  
442  
443  
444  
445  
446  
447  
448  
449  
450  
451  
452  
453  
454  
455  
456  
457  
458  
459  
460  
461  
462  
463  
464  
465  
466  
467  
468  
469  
470  
471  
472  
473  
474  
475  
476  
477  
478  
479  
480  
481  
482  
483  
484  
485  
486  
487  
488  
489  
490  
491  
492  
493  
494  
495  
496  
497  
498  
499  
500  
501  
502  
503  
504  
505  
506  
507  
508  
509  
510  
511  
512  
513  
514  
515  
516  
517  
518  
519  
520  
521  
522  
523  
524  
525  
526  
527  
528  
529  
530  
531  
532  
533  
534  
535  
536  
537  
538  
539  
540  
541  
542  
543  
544  
545  
546  
547  
548  
549  
550  
551  
552  
553  
554  
555  
556  
557  
558  
559  
560  
561  
562  
563  
564  
565  
566  
567  
568  
569  
570  
571  
572  
573  
574  
575  
576  
577  
578  
579  
580  
581  
582  
583  
584  
585  
586  
587  
588  
589  
590  
591  
592  
593  
594  
595  
596  
597  
598  
599  
600  
601  
602  
603  
604  
605  
606  
607  
608  
609  
610  
611  
612  
613  
614  
615  
616  
617  
618  
619  
620  
621  
622  
623  
624  
625  
626  
627  
628  
629  
630  
631  
632  
633  
634  
635  
636  
637  
638  
639  
640  
641  
642  
643  
644  
645  
646  
647  
648  
649  
650  
651  
652  
653  
654  
655  
656  
657  
658  
659  
660  
661  
662  
663  
664  
665  
666  
667  
668  
669  
670  
671  
672  
673  
674  
675  
676  
677  
678  
679  
680  
681  
682  
683  
684  
685  
686  
687  
688  
689  
690  
691  
692  
693  
694  
695  
696  
697  
698  
699  
700  
701  
702  
703  
704  
705  
706  
707  
708  
709  
710  
711  
712  
713  
714  
715  
716  
717  
718  
719  
720  
721  
722  
723  
724  
725  
726  
727  
728  
729  
730  
731  
732  
733  
734  
735  
736  
737  
738  
739  
740  
741  
742  
743  
744  
745  
746  
747  
748  
749  
750  
751  
752  
753  
754  
755  
756  
757  
758  
759  
760  
761  
762  
763  
764  
765  
766  
767  
768  
769  
770  
771  
772  
773  
774  
775  
776  
777  
778  
779  
780  
781  
782  
783  
784  
785  
786  
787  
788  
789  
790  
791  
792  
793  
794  
795  
796  
797  
798  
799  
800  
801  
802  
803  
804  
805  
806  
807  
808  
809  
810  
811  
812  
813  
814  
815  
816  
817  
818  
819  
820  
821  
822  
823  
824  
825  
826  
827  
828  
829  
830  
831  
832  
833  
834  
835  
836  
837  
838  
839  
840  
841  
842  
843  
844  
845  
846  
847  
848  
849  
850  
851  
852  
853  
854  
855  
856  
857  
858  
859  
860  
861  
862  
863  
864  
865  
866  
867  
868  
869  
870  
871  
872  
873  
874  
875  
876  
877  
878  
879  
880  
881  
882  
883  
884  
885  
886  
887  
888  
889  
890  
891  
892  
893  
894  
895  
896  
897  
898  
899  
900  
901  
902  
903  
904  
905  
906  
907  
908  
909  
910  
911  
912  
913  
914  
915  
916  
917  
918  
919  
920  
921  
922  
923  
924  
925  
926  
927  
928  
929  
930  
931  
932  
933  
934  
935  
936  
937  
938  
939  
940  
941  
942  
943  
944  
945  
946  
947  
948  
949  
950  
951  
952  
953  
954  
955  
956  
957  
958  
959  
960  
961  
962  
963  
964  
965  
966  
967  
968  
969  
970  
971  
972  
973  
974  
975  
976  
977  
978  
979  
980  
981  
982  
983  
984  
985  
986  
987  
988  
989  
990  
991  
992  
993  
994  
995  
996  
997  
998  
999  
1000

Out of 1,016,868 pupils in the census between 2008 and 2013, 18,595 (1.8%) were identified as having Additional Support Needs due to intellectual disabilities in at least two school census years. There

1  
2  
3 were 976,089 pupils without any records of intellectual disabilities or autism. Of these, 781,862 pupils  
4 attended school for at least two years over the study period and were designated as controls.  
5  
6

7 Using data from the pupils' first year in the Census, pupils with intellectual disabilities were more likely  
8 to be male, and more likely to reside in areas of greater neighbourhood deprivation, and to have been  
9 registered for free school meals, compared to their peers (Table 2). Pupils with intellectual disabilities  
10 were also more likely to require adaptations in school, including physical adaptations, communication  
11 and curriculum adaptations. The majority of the study population were identified as having white  
12 (white -Scottish, -British or -other) ethnicity.  
13  
14  
15  
16  
17  
18  
19  
20  
21  
22  
23  
24  
25  
26  
27  
28  
29  
30  
31  
32  
33  
34  
35  
36  
37  
38  
39  
40  
41  
42  
43  
44  
45  
46  
47  
48  
49  
50  
51  
52  
53  
54  
55  
56  
57  
58  
59  
60

For peer review only

Table 2. Demographic information for pupils with intellectual disabilities compared with their peers

| Demographic information              | Intellectual disabilities |         | Control pupils |        |
|--------------------------------------|---------------------------|---------|----------------|--------|
|                                      | pupils                    |         |                |        |
| <b>Total, n</b>                      | 18,595                    |         | 781,862        |        |
| <b>Male sex, n (%)</b>               | 12,107                    | (65%)** | 391,367        | (50%)  |
| <b>Free school meals, n (%)</b>      | 9,677                     | (52%)** | 198,038        | (25%)  |
| <b>Disability adaptations, n (%)</b> |                           |         |                |        |
| Physical adaptation                  | 2010                      | (11%)** | 1863           | (0.2%) |
| Curriculum adaptation                | 6,745                     | (36%)** | 6,459          | (0.8%) |
| Communication adaptation             | 3,623                     | (19%)** | 1,804          | (0.2%) |
| <b>SIMD quintile, n (%)</b>          |                           |         |                |        |
| 1 (most deprived)                    | 6007                      | (32%)   | 172,654        | (22%)  |
| 2                                    | 3946                      | (21%)   | 150,985        | (19%)  |
| 3                                    | 3415                      | (18%)   | 151,958        | (19%)  |
| 4                                    | 2907                      | (16%)   | 157,287        | (20%)  |
| 5 (least deprived)                   | 2320                      | (13%)** | 148,978        | (19%)  |
| <b>Ethnicity, n (%)</b>              |                           |         |                |        |
| White <sup>a</sup>                   | 17,347                    | (93%)   | 726,824        | (93%)  |
| Asian <sup>a</sup>                   | 523                       | (3%)    | 23,726         | (3%)   |
| Mixed or multiple ethnicities        | 265                       | (1%)    | 11,585         | (2%)   |
| African, Caribbean or black          | 100                       | (<1%)   | 4971           | (<1%)  |
| Other ethnic groups                  | 132                       | (<1%)   | 6602           | (<1%)  |
| Not disclosed / or unknown           | 228                       | (1%)    | 8154           | (1%)   |

\*\* p ≤0.001,  $\chi^2$  compared to control group (For SIMD -  $\chi^2$  test was across all categories, overall p value)

<sup>a</sup> (white -Scottish, -British, -Other) (Asian -Indian/British/Scottish, -Pakistani/British/Scottish, -Bangladeshi/British/Scottish, -Chinese/British/Scottish)

### *Mortality analysis*

Linking the pupil census population to the NRS registry of deaths up to February 2015 resulted in the equivalent of 3,760,998 person-years of follow up. There were 567 deaths identified in the study population during this period. There were 106 deaths (0.6%) among children and young people with intellectual disabilities over 68,539 person-years, which translated to a crude mortality rate of 154 deaths per 100,000 person-years (95% CI 128, 188). In the control group, there were 461 deaths (<0.1%) over 3,692,459 person-years, which translated to a crude mortality rate of 13 deaths per 100,000 person-years (95% CI 12, 14). The mean age of death among children and young people with intellectual disabilities was 14.3 years (95% CI 13.3 to 15.1) which was significantly lower ( $p < 0.001$ ) than controls where the mean age of death was 16.1 years (15.7 to 16.5). Sixty-two percent of deaths among children with intellectual disabilities occurred in males which was equivalent to the sex distribution in the whole intellectual disabilities cohort ( $p = 0.538$ ). Among controls, 61% of deaths occurred in males in spite of them accounting for only 50% of this group ( $p < 0.001$ ). Over 50% of deaths among pupils with intellectual disabilities occurred during childhood (<15 years old), compared to 29% of deaths among controls.

The all-cause SMR was 12.1 (95% CI 10.0, 14.6), as shown in Figure 1. The SMR was higher for female pupils than male pupils with intellectual disabilities; female SMR 16.4 (12.0, 22.3) versus male SMR 9.6 (7.5, 12.2). Exclusion of external causes of death resulted in a considerable increase in the all-cause SMR for both females and males with intellectual disabilities; overall SMR was 21.4 (17.6, 26.0), female SMR 25.2 (18.5, 34.3) versus male SMR 19.0 (14.8, 24.5).

The childhood (aged 5-14 years) SMR was 22.5 (17.3, 29.3) and was higher for females than males with intellectual disabilities; female SMR 30.0 (19.5, 46.0) versus male SMR 18.1 (13.0, 25.4). For young people ( $\geq 15$  years old) SMR was 8.1 (6.1, 10.6) and was also higher for females than males with intellectual disabilities; female SMR 10.9 (7.0, 17.1) versus male SMR 6.4 (4.5, 9.0). Hence, the difference from the control pupils was greater in children rather than young people for both females and males.

- Insert Figure 1 about here -

### *Cause of Death*

Cause of death data was available for over 95% of deaths among pupils with intellectual disabilities and over 90% deaths among controls. Table 3 shows the underlying causes of death and all-contributing causes of death by ICD 10 chapter. There were major differences between pupils with intellectual disabilities and controls with regards to the most common underlying causes. Among

1  
2  
3 pupils with intellectual disabilities, these were diseases of the nervous system (33%), congenital  
4 malformations, deformities and chromosomal abnormalities (22%), followed by nutritional, metabolic  
5 and endocrine diseases (8%) of which most were conditions which were the cause of the pupils'  
6 intellectual disabilities e.g. neuronal ceroid lipofuscinosis or ornithine metabolism disorders. These  
7 were followed by respiratory diseases (8%) and neoplasms (7%). The most common underlying cause  
8 of death among control pupils was deaths due to external causes (46%), which made up a higher  
9 proportion of all deaths than in the pupils with intellectual disabilities (5%). Among controls, 70% of  
10 deaths due to external causes occurred in boys, compared with 100% in the intellectual disabilities  
11 group.  
12  
13  
14  
15  
16  
17

18  
19 There were also differences in the most common all-contributing causes of death - those with any  
20 mention on the death certificate. These chapters were not mutually exclusive, since one death could  
21 be included in several categories. Of the 106 deaths among pupils with intellectual disabilities,  
22 diseases of the nervous system contributed to 56 and diseases of the respiratory system contributed  
23 to 55. The 56 diseases of the nervous system included 34 due to cerebral palsy and 16 due to epilepsy.  
24 The 55 diseases of the respiratory system included 27 due to pneumonia, 9 due to pneumonitis  
25 associated with food and vomit, 17 due to respiratory failure, and 15 other respiratory disorders. In  
26 comparison, the control pupils had diseases of the nervous system contributing to 41 of their 461  
27 deaths, and diseases of the respiratory system contributing to 52 of their 461 deaths which included  
28 22 due to pneumonia. The most common all-contributing causes of death for the control pupils were  
29 external causes of morbidity and mortality in 231 of their 461 deaths (compared with 16 of 106 deaths  
30 of the pupils with intellectual disabilities), and injury, poisoning and other consequences of external  
31 causes in 219 of their 461 deaths (compared with 10 of the 106 deaths in the pupils with intellectual  
32 disabilities).  
33  
34  
35  
36  
37  
38  
39  
40  
41  
42  
43  
44  
45  
46  
47  
48  
49  
50  
51  
52  
53  
54  
55  
56  
57  
58  
59  
60

**Table 3. The underlying causes of death and all-contributing factors in death by ICD 10 chapter for pupils with and without intellectual disabilities**

|                                                                                                                | Underlying cause of death    |             | All-contributing factors in death |             |
|----------------------------------------------------------------------------------------------------------------|------------------------------|-------------|-----------------------------------|-------------|
|                                                                                                                | Intellectual disabilities, n | Controls, n | Intellectual disabilities, n      | Controls, n |
| Chapter 1: Certain Infectious and parasite diseases                                                            | <5 (5%)                      | 12 (3%)     | 8                                 | 29          |
| Chapter 2: Neoplasms                                                                                           | 7 (7%)                       | 92 (20%)    | 8                                 | 94          |
| Chapter 3: Diseases of the blood and blood-forming organs and certain disorders involving the immune mechanism | <5 (5%)                      | <5 (1%)     | <5                                | 8           |
| Chapter 4: Endocrine, nutritional and metabolic diseases                                                       | 9 (8%)                       | 15 (3%)     | 11                                | 19          |
| Chapter 5: Mental and behavioural disorders                                                                    | <5 (5%)                      | <5 (1%)     | 6                                 | 17          |
| Chapter 6: Diseases of the Nervous system                                                                      | 35 (33%)                     | 20 (4%)     | 56                                | 41          |
| Chapter 8: Diseases of the Ear and mastoid process                                                             | <5 (5%)                      | 0           | <5                                | 0           |
| Chapter 9: Diseases of the Circulatory System                                                                  | <5 (5%)                      | 25 (5%)     | 15                                | 56          |
| Chapter 10: Diseases of the Respiratory System                                                                 | 8 (8%)                       | 18 (4%)     | 55                                | 52          |
| Chapter 11: Diseases of the Digestive System                                                                   | <5 (5%)                      | 6 (1%)      | 13                                | 11          |
| Chapter 13: Diseases of the Musculoskeletal system and connective tissue                                       | 0                            | <5 (1%)     | <5                                | 7           |
| Chapter 14: Diseases of the genitourinary system                                                               | <5 (5%)                      | <5 (1%)     | <5                                | <5          |
| Chapter 15: Pregnancy, childbirth and the puerperium                                                           | 0                            | <5 (1%)     | 0                                 | <5          |
| Chapter 17: Congenital malformations, deformities and chromosomal abnormalities                                | 23 (22%)                     | 13 (3%)     | 32                                | 18          |
| Chapter 18: Symptoms, signs and abnormal clinical and laboratory findings, not elsewhere classified            | NA                           | NA          | 28                                | 76          |
| Chapter 19: Injury, poisoning and certain other consequences of external causes                                | NA                           | NA          | 10                                | 219         |
| Chapter 20: External causes of morbidity and mortality                                                         | 5 (5%)                       | 210 (46%)   | 16                                | 231         |
| Unknown cause or error in underlying code                                                                      | 5 (5%)                       | 39 (8%)     | NA                                | NA          |
| <b>TOTAL</b>                                                                                                   | <b>106</b>                   | <b>461</b>  | <b>NA</b>                         | <b>NA</b>   |

Note – categories under 5 were repressed due to statistical disclosure.

1  
2  
3 Table 4 reports these data by presenting the cause-specific crude mortality rates by ICD 10 chapter  
4 for all pupils.  
5  
6  
7  
8  
9  
10  
11  
12  
13  
14  
15  
16  
17  
18  
19  
20  
21  
22  
23  
24  
25  
26  
27  
28  
29  
30  
31  
32  
33  
34  
35  
36  
37  
38  
39  
40  
41  
42  
43  
44  
45  
46  
47  
48  
49  
50  
51  
52  
53  
54  
55  
56  
57  
58  
59  
60

For peer review only



Table 4. Cause-specific crude mortality rates per 100,000 person-years for pupils with intellectual disabilities and control pupils

| ICD chapter <sup>a</sup><br>(Ranked by frequency in ID)                         | Underlying cause of death |      |        |      |       |          |        |     |  | All-contributing factors in death |      |        |       |     |          |        |     |     |  |
|---------------------------------------------------------------------------------|---------------------------|------|--------|------|-------|----------|--------|-----|--|-----------------------------------|------|--------|-------|-----|----------|--------|-----|-----|--|
|                                                                                 | Intellectual disabilities |      |        |      |       | Controls |        |     |  | Intellectual disabilities         |      |        |       |     | Controls |        |     |     |  |
|                                                                                 | (n)                       | CMR  | 95% CI |      | (n)   | CMR      | 95% CI |     |  | (n)                               | CMR  | 95% CI |       | (n) | CMR      | 95% CI |     |     |  |
| Chapter 6: Diseases of the Nervous system                                       | (35)                      | 51.1 | 36.7   | 71.1 | (20)  | 0.5      | 0.3    | 0.8 |  | (56)                              | 81.7 | 62.9   | 106.2 |     | (41)     | 1.1    | 0.8 | 1.5 |  |
| Chapter 17: Congenital malformations, deformities and chromosomal abnormalities | (23)                      | 33.6 | 22.3   | 50.5 | (13)  | 0.4      | 0.2    | 0.6 |  | (32)                              | 46.7 | 33.0   | 66.0  |     | (18)     | 0.5    | 0.3 | 0.8 |  |
| Chapter 4: Endocrine, nutritional and metabolic diseases                        | (9)                       | 13.1 | 6.8    | 25.2 | (15)  | 0.4      | 0.2    | 0.7 |  | (11)                              | 16.0 | 8.9    | 29.0  |     | (19)     | 0.5    | 0.3 | 0.8 |  |
| Chapter 10: Diseases of the Respiratory System                                  | (8)                       | 11.7 | 5.8    | 23.3 | (18)  | 0.5      | 0.3    | 0.8 |  | (55)                              | 80.2 | 61.6   | 104.5 |     | (52)     | 1.4    | 1.1 | 1.9 |  |
| Chapter 20: External causes of morbidity and mortality                          | (5)                       | 7.3  | 3.0    | 17.5 | (210) | 5.7      | 5.0    | 6.5 |  | (16)                              | 23.3 | 14.3   | 38.1  |     | (231)    | 6.3    | 5.5 | 7.1 |  |
| Chapter 9: Diseases of the Circulatory System                                   | (<5)                      | Na   |        |      |       |          |        |     |  | (15)                              | 21.9 | 13.2   | 36.3  |     | (56)     | 1.5    | 1.2 | 2.0 |  |
| Chapter 11: Diseases of the Digestive System                                    | (<5)                      | Na   |        |      |       |          |        |     |  | (13)                              | 19.0 | 11.0   | 32.7  |     | (11)     | 0.3    | 0.2 | 0.5 |  |
| <b>ICD chapter<sup>a</sup> (where n&lt;10)</b>                                  |                           |      |        |      |       |          |        |     |  |                                   |      |        |       |     |          |        |     |     |  |
| Chapter 2: Neoplasms                                                            | (7)                       | 10.2 | 4.9    | 21.4 | (92)  | 2.5      | 2.0    | 3.1 |  | (8)                               | 11.7 | 5.8    | 23.3  |     | (94)     | 2.5    | 2.1 | 3.1 |  |
| Chapter 1: Certain Infectious and parasite Diseases                             | (<5)                      | Na   |        |      |       |          |        |     |  | (8)                               | 11.7 | 5.8    | 23.3  |     | (29)     | 0.8    | 0.5 | 1.1 |  |
| Chapter 5: Mental and behavioural disorders                                     | (<5)                      | Na   |        |      |       |          |        |     |  | (6)                               | 8.8  | 3.9    | 19.5  |     | (17)     | 0.5    | 0.3 | 0.7 |  |

CMR=crude mortality rate ID=intellectual disabilities  
<sup>a</sup> ICD chapters with n<5 not reported due to statistical disclosure

1  
2  
3 The top 10 individual leading causes of death are shown in table 5. Among pupils with intellectual  
4 disabilities, the highest number of individual underlying cause of deaths were cerebral palsy (18%),  
5 followed by congenital brain deformities (8%), and neoplasms (7%). Where there were fewer than five  
6 individual deaths per cause, these causes were not reported due to statistical disclosure control. For  
7 the majority of deaths in pupils with intellectual disabilities this was the case; 85% of specific causes  
8 could not be disclosed. Among control pupils, the highest number of individual underlying cause of  
9 deaths were neoplasms (20%), and road traffic accidents (16%). In relation to their peers, only three  
10 of the top ten underlying causes of death among children with intellectual disabilities featured in the  
11 top ten list for the controls – neoplasms (7% vs 20% of controls), epilepsy (5% vs 2% controls), and  
12 accidents (non-road traffic related, <5% vs 9% controls).  
13  
14  
15  
16  
17  
18  
19  
20  
21  
22  
23  
24  
25  
26  
27  
28  
29  
30  
31  
32  
33  
34  
35  
36  
37  
38  
39  
40  
41  
42  
43  
44  
45  
46  
47  
48  
49  
50  
51  
52  
53  
54  
55  
56  
57  
58  
59  
60

1  
2  
3  
4  
5  
6  
7  
8  
9  
10  
11  
12  
13  
14  
15  
16  
17  
18  
19  
20  
21  
22  
23  
24  
25  
26  
27  
28  
29  
30  
31  
32  
33  
34  
35  
36  
37  
38  
39  
40  
41  
42  
43  
44  
45  
46

**Table 5. The top ten specific underlying causes of death, and all-contributing causes of death, for pupils with and without intellectual disabilities**

| Pupils with intellectual disabilities |    |                                   |    | Pupils without intellectual disabilities |    |                                  |     |
|---------------------------------------|----|-----------------------------------|----|------------------------------------------|----|----------------------------------|-----|
| Underlying cause of death             | n  | All-contributing factors          | n  | Underlying cause of death                | n  | All-contributing factors         | n   |
| Cerebral palsy                        | 19 | Cerebral palsy                    | 34 | All neoplasms                            | 92 | Signs and symptoms: injury       | 114 |
| Brain deformity                       | 9  | Pneumonia                         | 27 | Traffic accident                         | 76 | All neoplasms                    | 94  |
| All neoplasms                         | 7  | Respiratory failure               | 17 | Self-harm                                | 54 | Traffic accidents                | 76  |
| Muscular dystrophy                    | 6  | Epilepsy                          | 16 | Accidents, other                         | 41 | Self-harm                        | 54  |
| Epilepsy                              | 5  | Respiratory disorders             | 15 | External, undetermined intent            | 25 | Signs and symptoms: asphyxiation | 51  |
| Chromosomal abnormalities             | 5  | Brain deformity                   | 12 | Asthma                                   | 14 | Accident, other                  | 43  |
| Neuronal ceroid lipofuscinosis        | <5 | Chromosomal abnormalities         | 10 | Assault                                  | 13 | Signs and symptoms: poisoning    | 29  |
| Pneumonia including influenza         | <5 | Pneumonitis due to food and vomit | 9  | Infections                               | 12 | All infections                   | 29  |
| Congenital heart disease              | <5 | All neoplasms                     | 8  | Epilepsy                                 | 9  | External, undetermined intent    | 26  |
| Accidents, other                      | <5 | All infections                    | 8  | Cystic fibrosis                          | 8  | Pneumonia                        | 22  |
| Unknown causes                        | 5  | Ill-defined or ambiguous death    | 8  | Unknown causes                           | 39 | Ill-defined or ambiguous death   | 58  |

1  
2  
3 Cause-specific SMRs, indirectly standardised using five-year age-bands, are shown in Figure 2. For  
4 underlying causes, this was only possible for the two largest categories (by ICD 10 chapters); SMR  
5 101.4 (67.4, 152.5) for congenital malformations, deformities and chromosomal abnormalities, and  
6 SMR 89.7, (64.4, 125.0) for diseases of the nervous system. For all-contributing causes, the age-SMR  
7 for congenital malformations, deformities and chromosomal abnormalities was 97.6 (69.0, 138.0), and  
8 for diseases of the nervous system, was 71.7 (55.2, 93.2). The ratios were also high for diseases of the  
9 digestive system at 62.9 (36.5, 108.4); and for diseases of the respiratory system at 53.6 (41.2, 69.8).  
10 Despite external causes contributing to a larger proportion of deaths among the control group, the  
11 mortality rate was still higher in the intellectual disabilities group than in the controls; the crude rate  
12 was 23.3 per 100,000 person-years, compared to 6.3 per 100,000 for the controls for external cause  
13 of death (either as the underlying cause or as a contributing factor). This produced an SMR of 3.5 (2.2,  
14 5.8) demonstrating there is considerable over-representation in the intellectual disabilities group  
15 versus the controls.  
16

17  
18  
19  
20  
21  
22  
23  
24  
25  
26 - Insert Figure 2 about here -  
27

#### 28 *Avoidable mortality*

29  
30 According to the UK ONS definition of avoidable mortality, (deaths which are amenable, preventable,  
31 or both), 19% of deaths in the intellectual disabilities cohort were classed as avoidable; 15% of deaths  
32 were amenable to treatment, and 6% were preventable. The majority of avoidable deaths (80%) were  
33 considered amenable to treatment, for their age group, including epilepsy, pneumonia and  
34 neoplasms. Among the control pupils, 63% of deaths were classed as avoidable, 16% were amenable  
35 to treatment, and 48% were preventable. As recommended by the ONS[22], avoidable mortality rates  
36 based on low numbers should be labelled as unreliable and marked "U" or <sup>U</sup>. The crude avoidable  
37 mortality rate for pupils with intellectual disabilities was higher, at 29.2<sup>U</sup> (18.9, 45.2) per 100,000 in  
38 pupils with intellectual disabilities, compared to 7.9 (7.0, 8.8) per 100,000 in the control pupils. The  
39 SMR was 3.5<sup>U</sup> (2.3, 5.4). Further breakdown of avoidable rates was possible for deaths that were  
40 amenable to healthcare; in the intellectual disabilities group, the amenable mortality rate was 23.3<sup>U</sup>  
41 (14.3, 38.1) per 100,000 versus 2.0<sup>U</sup> (1.6, 2.6) per 100,000 in controls; and the SMR was found to be  
42 10.9<sup>U</sup>, (6.7, 17.8).  
43  
44  
45  
46  
47  
48  
49  
50  
51

52  
53 Among pupils with intellectual disabilities, there were additional causes of death that the authors of  
54 this paper consider would have been amenable to health care: aspiration pneumonia; otitis media;  
55 megacolon; gastrointestinal haemorrhage; gastroenteritis; and contributing causes of death including  
56 gastro-oesophageal reflux, and urinary tract infections. These are not currently included within the  
57 ONS list of underlying causes.  
58  
59  
60

## Discussion

### *Principle findings and interpretation*

Our study is one of very few that has reported mortality rates among children and young people with intellectual disabilities, and is highly novel in reporting underlying, all-contributing, and the most common individual causes of death at this age, including cause-specific SMRs. We have demonstrated that children and young people in Scotland with intellectual disabilities have a 12-fold risk of death compared to their peers, rising to 21-fold on excluding external causes. Pupils with intellectual disabilities were also over-represented in deaths that were amenable to healthcare, and were approximately 3.5 times more likely to experience an avoidable death (albeit calculated using unreliably low rates). Children aged 5 -14 years with intellectual disabilities had a higher risk relative to peers (SMR 22.5), than the young people aged  $\geq 15$  years with intellectual disabilities (SMR 8.1). This difference reflects that, in the general population, there were considerably more deaths in young people than in children, especially for males, as opposed to more deaths of children than young people with intellectual disabilities. The SMR was higher for female pupils in both age groups, reflecting the higher death rate of males in the controls. Nervous system and respiratory causes of death were the most common among children and young people with intellectual disabilities, including deaths that would have been amenable to quality health care, such as epilepsy, pneumonia, and pneumonitis due to food and vomit. It is highly important to identify amenable deaths so that actions can be devised and taken. Causes of death among children and young people with intellectual disabilities were higher across several disease categories than for other children and young people, including diseases of the nervous system, digestive system, respiratory system, endocrine, nutrition and metabolic diseases, diseases of the circulatory system, and external causes.

Previous studies have demonstrated that there is an increased risk of sudden unexpected death in epilepsy among people with intellectual disabilities, however, in our study, the majority of deaths which listed epilepsy as a contributing factor, also listed pneumonia, so this does not appear to account for our findings.

Whilst external causes of deaths accounted for the greatest proportion of deaths among control children and young people (46%), especially in males, we found that external causes of death were still over-represented among children and young people with intellectual disabilities compared with their controls (partly due to inhalation of gastric contents, and inhalation of objects obstructing breathing). Trollor et al. (2017)[19] hypothesised that higher SMRs in adult women than men with intellectual disabilities may be driven by the larger proportion of male deaths in the general population due to external causes; and the lack of equivalent deaths in males with intellectual disabilities.

1  
2  
3 However, in our population of children and young people, when we re-calculated SMRs to exclude  
4 external causes, the observed increase in risk for females remained. Hence at this age range, this is  
5 only a partial explanation for the sex differences in SMRs, and there are further risk factors and  
6 vulnerabilities which require further exploration. It should be noted however, that in children and  
7 young people with intellectual disabilities, not all studies report a higher SMR in females compared  
8 with males[10, 11].  
9

#### 14 *Comparison with previous studies*

16 Two previous studies[9, 16] have reported a higher SMR for children than for young people. Glover et  
17 al. 2017[9] reported results separately for children aged 0-9 years, (SMR 30.4) and young people aged  
18 10-17 years with intellectual disabilities (SMR 17.3). The Australian study by Bourke et al. 2017[16]  
19 reported a higher adjusted Hazard Ratio (aHR) for children aged 6-10 years (aHR 12.6) than young  
20 people aged 11-25 years (aHR 4.9). The SMRs we report are lower than those reported by Glover et  
21 al. (2017)[9], but the extent of difference between the children and young people is similar, albeit for  
22 differently defined age groups. The confidence intervals reported in our study are narrower due to  
23 the larger sample size. The SMRs we report are higher than those previously reported from small scale  
24 studies in Finland and USA[8, 10, 14], and a larger one in the Republic of Ireland[15], yet lower than a  
25 study reported from England[9], and a small study in Canada[11]. These differences may be due to  
26 actual international differences, or due to methodological differences between studies including: the  
27 method and source of identification of the population with intellectual disabilities; age ranges  
28 included; and study size with several of the previous studies having produced results with wide  
29 confidence intervals. All of these studies report a higher SMR in females than in males, except the  
30 study conducted in Canada and one in Finland.  
31

32  
33 The only previous study that has reported cause of death for children and young people did so for the  
34 age group 1-25 years, so includes some deaths of adults rather than just children and young  
35 people[16]. It reported the most common causes of death to be infections in 50% (particularly  
36 respiratory infections in 34%), birth defects in 19% (particularly cardiac defect in 15%), and accidents  
37 in 11%, although by ICD 10 chapter deaths due to diseases of the respiratory tract were reported for  
38 4.6%, infections and parasitic diseases were 3.1%, and external causes were 7.7%; and the most  
39 common were congenital malformations, deformities and chromosomal abnormalities in 29.1%, and  
40 diseases of the nervous system in 27.6%. They did not report cause-specific SMRs by ICD 10 chapters,  
41 but crude numbers were proportionally higher for the children with intellectual disabilities for  
42 diseases of the nervous system, endocrine, nutritional and metabolic diseases, and congenital  
43 malformations, and lower for conditions originating in the perinatal period, external causes, or injury  
44  
45  
46  
47  
48  
49  
50  
51  
52  
53  
54  
55  
56  
57  
58  
59  
60

1  
2  
3 or poisoning[16]. We demonstrated diseases of the nervous system and respiratory system to be the  
4 most common causes of death, and that cause-specific SMRs were raised across all of congenital  
5 malformations, deformities and chromosomal abnormalities, diseases of the nervous system,  
6 digestive system, respiratory system, endocrine, nutrition and metabolic diseases, circulatory system,  
7 and external causes.  
8  
9

10  
11  
12 Glover et al (2017) graphed avoidable deaths in his study of children and adults[9]. We are unaware  
13 of any previous studies numerically quantifying amenable deaths among children and young people  
14 with intellectual disabilities.  
15  
16

### 17 *Strengths and limitations*

18  
19  
20 Our study drew upon data from an entire country, collected annually, and linked to national death  
21 records. It was large in scale, including over 18,000 children and young people with intellectual  
22 disabilities, and a large control population. A record of intellectual disabilities at school brings an  
23 entitlement to additional support so is likely to drive good recording in high income countries like  
24 Scotland. However, it only uses a binary definition for intellectual disabilities, therefore the study  
25 could not investigate mortality among people with different causes and severities of intellectual  
26 disabilities. Our study was not large enough to delineate cause-specific mortality ratios by sex, nor to  
27 study whether there are any ethnic variations. Use of death certificate data is known to have  
28 limitations[22], including inconsistent reporting and no reporting of severity of conditions. There may  
29 be some diagnostic overshadowing in death certificate data for people with intellectual disabilities,  
30 obscuring the events leading to death[23-25]. The ONS list of avoidable deaths does not include some  
31 that appear important among children and young people with intellectual disabilities, such as  
32 aspiration pneumonia, otitis media, megacolon, gastrointestinal haemorrhage, gastroenteritis, which  
33 featured as an underlying cause of death in our data. Additionally, death certificate data does not  
34 include wider determinants of health and death that may be implicated, such as being the target of  
35 discrimination or neglect.  
36  
37  
38  
39  
40  
41  
42  
43  
44  
45  
46

### 47 *Conclusions and future directions*

48  
49  
50 It is extremely important to study deaths among children and young people with intellectual  
51 disabilities, especially as so few studies have previously done so. Amongst the studies that have, there  
52 exists wide variation in the extent of reported inequality compared to other children and young  
53 people, and wide confidence intervals, but all show a higher SMR. Our large study provides robust  
54 data that quantifies the extent of the difference; children and young people have a 12 times higher  
55 risk of death. A larger body of research exists for adults (rather than children and young people) with  
56  
57  
58  
59  
60

1  
2  
3 intellectual disabilities, and demonstrates substantial inequalities, and a high proportion of amenable  
4 deaths that could be addressed via reasonable adjustments in care provision. In our study, we have  
5 now reported that children and young people with intellectual disabilities also experience inequalities  
6 and experience amenable deaths. This is important, and we need a better understanding of it so that  
7 targeted improvements in care can start to be developed and delivered to reduce this inequality.  
8 Heslop et al (2014)[26] conducted a confidential inquiry into deaths of people with intellectual  
9 disabilities and made recommendations for improvements to practice regarding respiratory deaths,  
10 including aggressive monitoring and treatment of gastro-oesophageal reflux as well as postural and  
11 physical therapies. We have found that this is also important for children and young people with  
12 intellectual disabilities, if we are serious about improving life expectancy. Additionally, Scotland now  
13 offers influenza vaccines to all primary school aged children to reduce pneumonia; we therefore need  
14 to understand uptake by children with intellectual disabilities, and its determinants, to gauge whether  
15 this will change mortality findings.

16  
17 The results of this study should be used to inform and direct multidisciplinary healthcare teams, as  
18 well as educators and carers to the associated risks of mortality in childhood and generate greater  
19 awareness around potential areas of improvement. Our countrywide study had a mean follow-up of  
20 around 5 years, and given that the pupil census is recorded annually, it presents the framework for  
21 further work to investigate both mortality trends in children and young people with intellectual  
22 disabilities, and a more detailed understanding of these.

23  
24  
25  
26  
27  
28  
29  
30  
31  
32  
33  
34  
35  
36  
37  
38  
39 Acknowledgements: We thank the ScotXed Pupil Census, the National Records of Scotland, and  
40 Information Services Division (ISD) of NHS Scotland for providing data and the eData Research and  
41 Innovation Service team at ISD Scotland for assisting with the data linkage and analysis stage of this project.

42  
43  
44 Contributors: GS analysed the data, interpreted findings and wrote the first draft of the manuscript. MF  
45 developed record linkage, analysed the data, interpreted findings and contributed to the manuscript. JP  
46 developed record linkage, interpreted findings and contributed to the manuscript. DK, AH & CM  
47 interpreted data and contributed to the manuscript, S-AC conceived the study, analysed and interpreted  
48 the data, and contributed to the manuscript. All authors approved the final version of the manuscript.

49  
50  
51  
52 Funding: This study was funded by an MRC Mental Health Data Pathfinder Award (MC\_PC\_17217), and  
53 the Scottish Government via the Scottish Learning Disabilities Observatory.

54  
55  
56 Disclaimer: The funders had no role in the study design, collection, analyses or interpretation of data,  
57 writing the report nor the decision to submit the article for publication.



1  
2  
3 Competing Interests: None declared.  
4

5 Patient Consent: Not required.  
6

7  
8 Ethics approval: This study received approval from the NHS National Services Scotland Privacy Advisory  
9 Committee.  
10

11 Data sharing statement: This study linked patient information held across several administrative health  
12 datasets within ISD Scotland, with externally held data held by the Scottish Government (ScotXed  
13 education), and National Records of Scotland. Linkage and de-identification of data was performed by the  
14 Information Services Division (ISD) of NHS National Services Scotland (NSS). A data processing agreement  
15 between NHS NSS and University of Glasgow and a data sharing agreement between ScotXed and  
16 University of Glasgow was drafted. The University of Glasgow were authorised to receive record linked  
17 data controlled and held by ISD within NSS, via access through the national safe haven. The ISD Statistical  
18 Disclosure Control Protocol was followed. It is therefore not possible to share data with other parties.  
19  
20  
21  
22  
23  
24  
25  
26  
27  
28  
29  
30  
31  
32  
33  
34  
35  
36  
37  
38  
39  
40  
41  
42  
43  
44  
45  
46  
47  
48  
49  
50  
51  
52  
53  
54  
55  
56  
57  
58  
59  
60

## References

1. Emerson E, Hatton C. Mental health of children and adolescents with intellectual disabilities in Britain. *Br J Psychiatry* 2007;191:493-499.
2. Hughes-McCormack LA, Rydzewska E, Henderson A, et al. Prevalence and general health status of people with intellectual disabilities in Scotland -a total population study. *J Epidemiol Community Health* 2017a;72:78–85.
3. Hughes-McCormack LA, Rydzewska E, Henderson A, et al. Prevalence of mental health conditions and relationship with general health in a whole country population of people with intellectual disabilities compared with the general population. *BJPsych Open* 2017b;3:243-248.
4. Heslop P, Lauer E, Hoghton M. Mortality in people with intellectual disabilities. *J Appl Res Intellect Disabil* 2015;28:367–372.
5. Hosking FJ, Carey IM, Shah SM, et al. Mortality among adults with intellectual disability in England: Comparisons with the general population. *Am J Public Health* 2016;106(8):1483–1490
6. O’Leary L, Cooper SA, Hughes-McCormack LA. Early death and causes of death of people with intellectual disabilities: A systematic review. *J Appl Res Intellect Disabil* 2018a;31:325–342.
7. O’Leary L, Hughes-McCormack LA, Dunn K, et al. Early death and causes of death of people with Down syndrome a systematic review. *J Appl Res Intellect Disabil* 2018b;31(5):687-708
8. Decouflé P, Autry A. Increased mortality in children and adolescents with developmental disabilities. *Paediatr Perinat Epidemiol* 2002;16(4):375–382
9. Glover G, Williams R, Heslop P, et al. Mortality in people with intellectual disabilities in England. *J Intellect Disabil Res* 2017;61(1):62–74
10. Patja K, Mölsä P, Iivanainen M. Cause-specific mortality of people with intellectual disability in a population-based, 35-year follow-up study. *J Intellect Disabil Res* 2001;45:30–40
11. Ouellette-Kuntz H, Shooshtari S, Balogh R, et al. Understanding information about mortality among people with intellectual and developmental disabilities in Canada. *J Appl Res Intellect Disabil* 2015;28(5):423–435
12. McGuigan SM, Hollins S, Attard M. Age-specific standardized mortality rates in people with learning disability. *J Intellect Disabil Res* 1995;39(6):527-531
13. Forsgren L, Edvinsson SO, Nystrom L, et al. Influence of epilepsy on mortality in mental retardation: An epidemiologic study. *Epilepsia* 1996;37(10):956–963.
14. Arvio M, Salokivi T, Tiitinen A, et al. Mortality in individuals with intellectual disabilities in Finland. *Brain Behav* 2016;6(2):1–4.
15. McCarron M, Carroll R, Kelly C, et al. Mortality rates in the general Irish population compared to those with an intellectual disability from 2003 to 2012. *J Appl Res Intellect Disabil* 2015;28(5):406–413

- 1  
2  
3  
4  
5  
6  
7  
8  
9  
10  
11  
12  
13  
14  
15  
16  
17  
18  
19  
20  
21  
22  
23  
24  
25  
26  
27  
28  
29  
30  
31  
32  
33  
34  
35  
36  
37  
38  
39  
40  
41  
42  
43  
44  
45  
46  
47  
48  
49  
50  
51  
52  
53  
54  
55  
56  
57  
58  
59  
60
16. Bourke J, Nembhard WN, Wong K, et al. Twenty-Five Year Survival of Children with Intellectual Disability in Western Australia. *J Pediatr* 2017;188:232-239.e2.
  17. Durvasula S, Beange H, Baker W. Mortality of people with intellectual disability in northern Sydney. *J Intellect Dev Disabil* 2002;27(4):255–264.
  18. Scottish Index of Multiple Deprivation Background and Methodology, Scottish Government Website. <https://www2.gov.scot/Topics/Statistics/SIMD/BackgroundMethodology> (accessed July 2019)
  19. Trollor J, Srasuebku P, Xu H, et al. Cause of death and potentially avoidable deaths in Australian adults with intellectual disability using retrospective linked data. *BMJ Open* 2017;7:e013489.
  20. International Statistical Classification of Diseases and Related Health Problems 10<sup>th</sup> Revision, Volume 2 Instruction manual, 2010 edition. WHO. [https://www.who.int/classifications/icd/ICD10Volume2\\_en\\_2010.pdf](https://www.who.int/classifications/icd/ICD10Volume2_en_2010.pdf) (accessed July 2019).
  21. Olatunde O, Windsor-Shellard B, Campbell A. Revised definition of avoidable mortality and new definition for children and young people. Office for National Statistics 2016. <https://www.ons.gov.uk/file?uri=/aboutus/whatwedo/statistics/consultationsandsurveys/allconsultationsandsurveys/reviewofavoidablemortalitydefinition/reviseddefinitionofavoidablemortalityandnewdefinitionforchildrenandyoungpeople.doc> (accessed July 2019)
  22. Office of National Statistics: Avoidable mortality in the UK Quality and Methodology Information. Office of National Statistics 2019. <https://www.ons.gov.uk/peoplepopulationandcommunity/healthandsocialcare/causesofdeath/methodologies/avoidablemortalityinenglandandwalesqmi> (accessed July 2019)
  23. Landes SD, Peek CW. Death by mental retardation? The influence of ambiguity on death certificate coding error for adults with intellectual disability. *J Intellect Disabil Res* 2013;57(12):1183-1190
  24. Glover, G, Ayub M. How people with learning disabilities die. Improving Health and Lives Learning Disability Observatory, Durham 2010. <https://www.gov.uk/government/publications/people-with-learning-disabilities-in-england-2015> (accessed July 2019)
  25. Landes SD, Stevens JD, Turk MA. Obscuring effect of coding developmental disability as the underlying cause of death on mortality trends for adults with developmental disability: a cross-sectional study using US Mortality Data from 2012 to 2016. *BMJ Open* 2019;9:e026614.
  26. Heslop P, Blair PS, Fleming P, et al. The Confidential Inquiry into premature deaths of people with intellectual disabilities in the UK: a population-based study. *Lancet* 2014;383(9920):889-895

1  
2  
3 **Figure 1. Forest Plot of age-standardised and gender-specific mortality ratios for pupils with intellectual disabilities**  
4

5 **Figure 2. Forest plot of cause-specific age-Standardised Mortality Ratios for pupils with intellectual disabilities by ICD 10 chapter for underlying cause of death and for**  
6 **all-contributing factors of death**  
7

8  
9 *Footnote: Age-standardised mortality ratios (SMRs) & 95% confidence intervals were calculated using 5-year age bands for all ICD 10 chapters with  $\geq 10$  deaths*  
10

11  
12  
13  
14  
15  
16  
17  
18  
19  
20  
21  
22  
23  
24  
25  
26  
27  
28  
29  
30  
31  
32  
33  
34  
35  
36  
37  
38  
39  
40  
41  
42  
43  
44  
45  
46

For peer review only

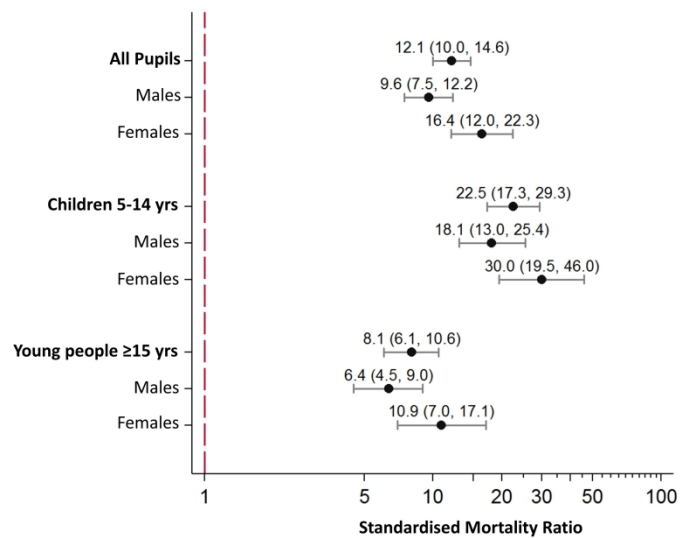

Figure 1. Forest Plot of age-standardised and gender-specific mortality ratios for pupils with intellectual disabilities

338x190mm (300 x 300 DPI)

1  
2  
3  
4  
5  
6  
7  
8  
9  
10  
11  
12  
13  
14  
15  
16  
17  
18  
19  
20  
21  
22  
23  
24  
25  
26  
27  
28  
29  
30  
31  
32  
33  
34  
35  
36  
37  
38  
39  
40  
41  
42  
43  
44  
45  
46  
47  
48  
49  
50  
51  
52  
53  
54  
55  
56  
57  
58  
59  
60

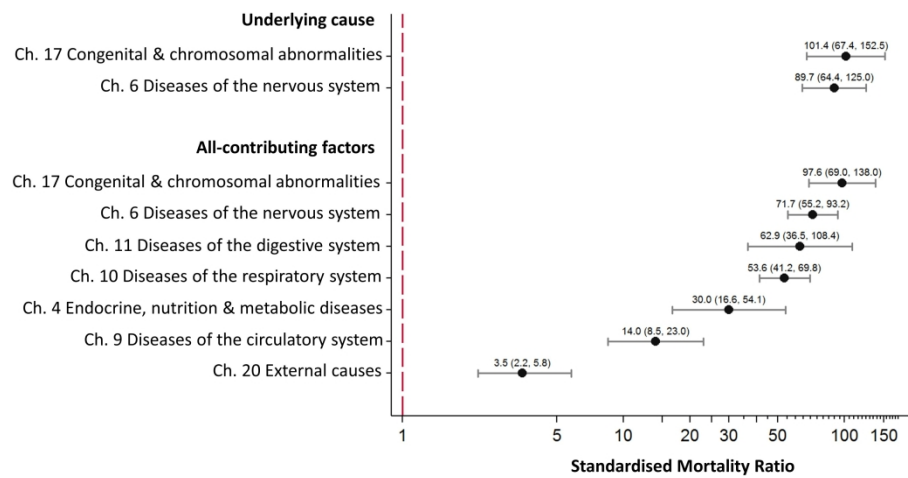

Figure 2. Forest plot of cause-specific age-Standardised Mortality Ratios for pupils with intellectual disabilities by ICD 10 chapter for underlying cause of death and for all-contributing factors of death  
Footnote: Age-standardised mortality ratios (SMRs) & 95% confidence intervals were calculated using 5-year age bands for all ICD 10 chapters with ≥10 deaths

338x190mm (300 x 300 DPI)

## STROBE Statement—checklist of items that should be included in reports of observational studies

|                              | Item No | Recommendation                                                                                                                                                                                                                                                                                                                                                                                                                                                         | Page No |
|------------------------------|---------|------------------------------------------------------------------------------------------------------------------------------------------------------------------------------------------------------------------------------------------------------------------------------------------------------------------------------------------------------------------------------------------------------------------------------------------------------------------------|---------|
| <b>Title and abstract</b>    | 1       | (a) Indicate the study's design with a commonly used term in the title or the abstract                                                                                                                                                                                                                                                                                                                                                                                 | 1       |
|                              |         | (b) Provide in the abstract an informative and balanced summary of what was done and what was found                                                                                                                                                                                                                                                                                                                                                                    | 1       |
| <b>Introduction</b>          |         |                                                                                                                                                                                                                                                                                                                                                                                                                                                                        |         |
| Background/rationale         | 2       | Explain the scientific background and rationale for the investigation being reported                                                                                                                                                                                                                                                                                                                                                                                   | 3       |
| Objectives                   | 3       | State specific objectives, including any prespecified hypotheses                                                                                                                                                                                                                                                                                                                                                                                                       | 5       |
| <b>Methods</b>               |         |                                                                                                                                                                                                                                                                                                                                                                                                                                                                        |         |
| Study design                 | 4       | Present key elements of study design early in the paper                                                                                                                                                                                                                                                                                                                                                                                                                | 6       |
| Setting                      | 5       | Describe the setting, locations, and relevant dates, including periods of recruitment, exposure, follow-up, and data collection                                                                                                                                                                                                                                                                                                                                        | 6       |
| Participants                 | 6       | (a) <i>Cohort study</i> —Give the eligibility criteria, and the sources and methods of selection of participants. Describe methods of follow-up<br><i>Case-control study</i> —Give the eligibility criteria, and the sources and methods of case ascertainment and control selection. Give the rationale for the choice of cases and controls<br><i>Cross-sectional study</i> —Give the eligibility criteria, and the sources and methods of selection of participants | 6       |
|                              |         | (b) <i>Cohort study</i> —For matched studies, give matching criteria and number of exposed and unexposed<br><i>Case-control study</i> —For matched studies, give matching criteria and the number of controls per case                                                                                                                                                                                                                                                 | Na      |
| Variables                    | 7       | Clearly define all outcomes, exposures, predictors, potential confounders, and effect modifiers. Give diagnostic criteria, if applicable                                                                                                                                                                                                                                                                                                                               | 6       |
| Data sources/<br>measurement | 8*      | For each variable of interest, give sources of data and details of methods of assessment (measurement). Describe comparability of assessment methods if there is more than one group                                                                                                                                                                                                                                                                                   | 7       |
| Bias                         | 9       | Describe any efforts to address potential sources of bias                                                                                                                                                                                                                                                                                                                                                                                                              | 7       |
| Study size                   | 10      | Explain how the study size was arrived at                                                                                                                                                                                                                                                                                                                                                                                                                              | 5       |
| Quantitative variables       | 11      | Explain how quantitative variables were handled in the analyses. If applicable, describe which groupings were chosen and why                                                                                                                                                                                                                                                                                                                                           | 6       |
| Statistical methods          | 12      | (a) Describe all statistical methods, including those used to control for confounding                                                                                                                                                                                                                                                                                                                                                                                  | 6       |
|                              |         | (b) Describe any methods used to examine subgroups and interactions                                                                                                                                                                                                                                                                                                                                                                                                    | 7       |
|                              |         | (c) Explain how missing data were addressed                                                                                                                                                                                                                                                                                                                                                                                                                            | Na      |
|                              |         | (d) <i>Cohort study</i> —If applicable, explain how loss to follow-up was addressed<br><i>Case-control study</i> —If applicable, explain how matching of cases and controls was addressed<br><i>Cross-sectional study</i> —If applicable, describe analytical methods taking account of sampling strategy                                                                                                                                                              | Na      |
|                              |         | (e) Describe any sensitivity analyses                                                                                                                                                                                                                                                                                                                                                                                                                                  | Na      |

Continued on next page

| <b>Results</b>           |     |                                                                                                                                                                                                              |    |
|--------------------------|-----|--------------------------------------------------------------------------------------------------------------------------------------------------------------------------------------------------------------|----|
| Participants             | 13* | (a) Report numbers of individuals at each stage of study—eg numbers potentially eligible, examined for eligibility, confirmed eligible, included in the study, completing follow-up, and analysed            | 7  |
|                          |     | (b) Give reasons for non-participation at each stage                                                                                                                                                         | 8  |
|                          |     | (c) Consider use of a flow diagram                                                                                                                                                                           | Na |
| Descriptive data         | 14* | (a) Give characteristics of study participants (eg demographic, clinical, social) and information on exposures and potential confounders                                                                     | 8  |
|                          |     | (b) Indicate number of participants with missing data for each variable of interest                                                                                                                          | Na |
|                          |     | (c) <i>Cohort study</i> —Summarise follow-up time (eg, average and total amount)                                                                                                                             | 10 |
| Outcome data             | 15* | <i>Cohort study</i> —Report numbers of outcome events or summary measures over time                                                                                                                          | 10 |
|                          |     | <i>Case-control study</i> —Report numbers in each exposure category, or summary measures of exposure                                                                                                         |    |
|                          |     | <i>Cross-sectional study</i> —Report numbers of outcome events or summary measures                                                                                                                           |    |
| Main results             | 16  | (a) Give unadjusted estimates and, if applicable, confounder-adjusted estimates and their precision (eg, 95% confidence interval). Make clear which confounders were adjusted for and why they were included | 10 |
|                          |     | (b) Report category boundaries when continuous variables were categorized                                                                                                                                    | 10 |
|                          |     | (c) If relevant, consider translating estimates of relative risk into absolute risk for a meaningful time period                                                                                             |    |
| Other analyses           | 17  | Report other analyses done—eg analyses of subgroups and interactions, and sensitivity analyses                                                                                                               | 17 |
| <b>Discussion</b>        |     |                                                                                                                                                                                                              |    |
| Key results              | 18  | Summarise key results with reference to study objectives                                                                                                                                                     | 18 |
| Limitations              | 19  | Discuss limitations of the study, taking into account sources of potential bias or imprecision. Discuss both direction and magnitude of any potential bias                                                   | 20 |
| Interpretation           | 20  | Give a cautious overall interpretation of results considering objectives, limitations, multiplicity of analyses, results from similar studies, and other relevant evidence                                   | 20 |
| Generalisability         | 21  | Discuss the generalisability (external validity) of the study results                                                                                                                                        | 20 |
| <b>Other information</b> |     |                                                                                                                                                                                                              |    |
| Funding                  | 22  | Give the source of funding and the role of the funders for the present study and, if applicable, for the original study on which the present article is based                                                | 21 |

\*Give information separately for cases and controls in case-control studies and, if applicable, for exposed and unexposed groups in cohort and cross-sectional studies.

**Note:** An Explanation and Elaboration article discusses each checklist item and gives methodological background and published examples of transparent reporting. The STROBE checklist is best used in conjunction with this article (freely available on the Web sites of PLoS Medicine at <http://www.plosmedicine.org/>, Annals of Internal Medicine at <http://www.annals.org/>, and Epidemiology at <http://www.epidem.com/>). Information on the STROBE Initiative is available at [www.strobe-statement.org](http://www.strobe-statement.org).



# BMJ Open

## Rates and causes of mortality among children and young people with and without intellectual disabilities in Scotland: a record linkage cohort study of 796,190 schoolchildren

|                                 |                                                                                                                                                                                                                                                                                                                                                                                                                                                                                                                                                          |
|---------------------------------|----------------------------------------------------------------------------------------------------------------------------------------------------------------------------------------------------------------------------------------------------------------------------------------------------------------------------------------------------------------------------------------------------------------------------------------------------------------------------------------------------------------------------------------------------------|
| Journal:                        | <i>BMJ Open</i>                                                                                                                                                                                                                                                                                                                                                                                                                                                                                                                                          |
| Manuscript ID                   | bmjopen-2019-034077.R1                                                                                                                                                                                                                                                                                                                                                                                                                                                                                                                                   |
| Article Type:                   | Original research                                                                                                                                                                                                                                                                                                                                                                                                                                                                                                                                        |
| Date Submitted by the Author:   | 08-Apr-2020                                                                                                                                                                                                                                                                                                                                                                                                                                                                                                                                              |
| Complete List of Authors:       | Smith, Gillian; University of Glasgow Institute of Health and Wellbeing<br>Fleming, Michael ; University of Glasgow, Institute of Health and Wellbeing<br>Kinnear, Deborah; University of Glasgow, Institute of Health and Wellbeing<br>Henderson, Angela; University of Glasgow, Institute of Health and Wellbeing<br>Pell, J. P.; University of Glasgow, Institute of Health and Wellbeing<br>Melville, Craig; University of Glasgow, Institute of Health and Wellbeing<br>Cooper, Sally-Ann; University of Glasgow, Institute of Health and Wellbeing |
| <b>Primary Subject Heading</b>: | Epidemiology                                                                                                                                                                                                                                                                                                                                                                                                                                                                                                                                             |
| Secondary Subject Heading:      | Public health, Paediatrics, Mental health                                                                                                                                                                                                                                                                                                                                                                                                                                                                                                                |
| Keywords:                       | intellectual disabilities, mortality, death, children, young people                                                                                                                                                                                                                                                                                                                                                                                                                                                                                      |
|                                 |                                                                                                                                                                                                                                                                                                                                                                                                                                                                                                                                                          |

SCHOLARONE™  
Manuscripts



I, the Submitting Author has the right to grant and does grant on behalf of all authors of the Work (as defined in the below author licence), an exclusive licence and/or a non-exclusive licence for contributions from authors who are: i) UK Crown employees; ii) where BMJ has agreed a CC-BY licence shall apply, and/or iii) in accordance with the terms applicable for US Federal Government officers or employees acting as part of their official duties; on a worldwide, perpetual, irrevocable, royalty-free basis to BMJ Publishing Group Ltd ("BMJ") its licensees and where the relevant Journal is co-owned by BMJ to the co-owners of the Journal, to publish the Work in this journal and any other BMJ products and to exploit all rights, as set out in our [licence](#).

The Submitting Author accepts and understands that any supply made under these terms is made by BMJ to the Submitting Author unless you are acting as an employee on behalf of your employer or a postgraduate student of an affiliated institution which is paying any applicable article publishing charge ("APC") for Open Access articles. Where the Submitting Author wishes to make the Work available on an Open Access basis (and intends to pay the relevant APC), the terms of reuse of such Open Access shall be governed by a Creative Commons licence – details of these licences and which [Creative Commons](#) licence will apply to this Work are set out in our licence referred to above.

Other than as permitted in any relevant BMJ Author's Self Archiving Policies, I confirm this Work has not been accepted for publication elsewhere, is not being considered for publication elsewhere and does not duplicate material already published. I confirm all authors consent to publication of this Work and authorise the granting of this licence.

1  
2  
3 **Rates and causes of mortality among children and young people with and**  
4 **without intellectual disabilities in Scotland: a record linkage cohort study of**  
5 **796,190 schoolchildren**  
6  
7  
8  
9

10  
11  
12 **Smith, G.S., Fleming, M., Kinnear, D., Henderson, A., Pell, J.P., Melville, C., Cooper, S-A.**  
13  
14

15  
16 **Corresponding author: Professor Sally-Ann Cooper; Sally-Ann.Cooper@glasgow.ac.uk**  
17  
18

19  
20  
21  
22 **Abstract**  
23

24  
25 **Objectives:** To investigate mortality rates and causes in children and young people with intellectual  
26 disabilities.  
27

28  
29 **Design:** Retrospective cohort; individual record-linkage between Scotland's annual pupil census and  
30 National Records of Scotland death register.  
31

32  
33 **Setting:** General community.  
34

35  
36 **Participants:** Pupils receiving Local Authority-funded schooling in Scotland, 2008-2013, with an  
37 Additional Support Need due to intellectual disabilities, compared with other pupils.  
38

39  
40 **Main outcome measures:** Deaths up to 2015: age of death, sex- and age-standardised mortality ratios  
41 (SMRs); causes of death including cause-specific age-SMRs; avoidable deaths as defined by UK Office  
42 of National Statistics.  
43

44  
45 **Results:** 18,278/947,922 (1.9%) pupils had intellectual disabilities. 106 died over 67,342 person-years  
46 (crude mortality rate=157/100,000 person-years), compared with 458 controls over 3,672,224 person-  
47 years (crude mortality rate=12/100,000 person-years). Age-, sex-SMR was 11.6 (95% CI 9.6, 14.0); 16.6  
48 (12.8, 22.6) for female pupils, 9.8 (7.7, 12.5) for male pupils. Most common main underlying causes  
49 were diseases of the nervous system, then congenital anomalies; most common all-contributing  
50 causes were diseases of the nervous system, then respiratory system; most common specific  
51 contributing causes were cerebral palsy, pneumonia, respiratory failure, and epilepsy. For all  
52 contributing causes, SMR was 98.8 (69.9, 139.7) for congenital anomalies, 76.5 (58.9, 99.4) for nervous  
53 system, 63.7 (37.0, 109.7) for digestive system, 55.3 (42.5, 72.1) for respiratory system, 32.1 (17.8,  
54 57.9) for endocrine, 14.8 (8.9, 24.5) for circulatory system. External causes accounted for 46% of  
55  
56  
57  
58  
59  
60

control deaths, but the SMR for external-related deaths was still higher (3.6 {2.2, 5.8}) for pupils with intellectual disabilities. Deaths amenable to good care were common.

**Conclusions:** Pupils with intellectual disabilities were much more likely to die than their peers, and had a different pattern of causes, including amenable deaths across a wide range of disease categories. Improvements are needed to reduce amenable deaths e.g. epilepsy-related and dysphagia, and to support families of children with life-limiting conditions.

### Strengths and limitations of this study

- Novel use of education records and record linkage to death records to study mortality in an unselected cohort of children and young people with intellectual disabilities
- Due to the use of a whole country population these results are well-powered and generalisable
- Despite comprising a whole country population, our study was not large enough to delineate cause-specific mortality ratios by sex
- This study was limited by lack of demographic and clinical diagnostic information including the severity or cause of intellectual disabilities
- Reliance on death certificate data is limited by inconsistencies in reporting of cause of death

### Key words

Intellectual disabilities, mortality, death, children, young people

## Introduction

Children and young people with intellectual disabilities have a much higher prevalence of physical and mental ill-health compared to the general population[1-3]. The life expectancy of people with intellectual disabilities has been reported to be about 20 years shorter than in the general population, or 28 years shorter specifically for people with Down syndrome[4-7]. While the actual number of deaths in childhood is smaller than in adults, mortality studies comparing people with intellectual disabilities with the general population have tended to show increased risk ratios in younger age groups compared to adults. However, the excess reported risk varies considerably between studies, and not all studies are comparable due to e.g. reporting deaths within different age ranges, and additionally some have small sample sizes and wide confidence intervals. Reported standardised mortality ratios (SMR) comparing people with and without intellectual disabilities, have ranged from 3.3 (95% confidence interval [CI] 2.1, 5.0) in young people aged 10-19 years[8], to 17.3 (95% CI 9.4, 29.0) in young people aged 10-17 years[9]; from 2.6 in males aged 2-19 years and 1.7 in females aged 2-19 years[10], to 21.6 (95% CI 10.8, 38.7) in males aged 0-19 years and 18.1 (95% CI 3.7, 53.0) in females aged 0-19 years[11], and have been reported to be 30.4 (95% CI 18.4, 47.5) in children aged 0-9 years[9]. We have summarised all previous studies to our knowledge which report mortality ratios for children and young people under aged 25, with and without intellectual disabilities, where they are reported separate from older age groups (online supplementary Appendix 1).

Most of these studies do not report causes of death among children and young people with intellectual disabilities. Bourke et al. (2017)[12] reported the most common causes of death in children, young people, and adults with intellectual disabilities aged 1-25 years to be respiratory infection (34%), with an additional 10% having an aspiration related cause, congenital heart defects (15%), and accidents (11%). Compared to children and young people who did not have intellectual disabilities, their causes of death by ICD 10 chapter were more likely to be attributed to the nervous system, endocrine, nutritional and metabolic diseases, or congenital malformations, and less likely to be attributed to conditions originating in the perinatal period, external causes, or injury or poisoning[12]. Patja et al. (2001)[10] reported respiratory diseases to be the most common underlying/immediate cause of death in children and young people with intellectual disabilities aged 2-19 years, with a relative risk of 5.8 (95% CI 4.4, 15.6) in males and 4.3 (0.3, 4.7) in females, and did not find any other causes (infectious diseases, tumours, vascular diseases, diseases of digestive system, accidents and poisonings, or other causes) to differ from those expected in the general population. However, the study was limited by small sample size. Durvasula et al. (2009)[13] reported 7 of 14 deaths among

1  
2  
3 young people with intellectual disabilities aged 10-24 years were attributed to the respiratory system  
4 (pneumonia, aspiration).  
5

6  
7 Adults with intellectual disabilities are over-represented in deaths which would have been amenable  
8 to treatment by timely and effective health care[4-5, 9]. However, there is limited evidence on  
9 whether children and young people with intellectual disabilities also experience such amenable deaths  
10 more commonly than other children and young people, as most authors who have reported cause-  
11 specific mortality do so grouped across all ages, due to sample sizes.  
12  
13

14  
15  
16 Overall, as shown in Appendix 1 (online supplementary), studies on mortality in children with  
17 intellectual disabilities are mostly small in size, and results are variable. Studies of causes of death  
18 exclusively in children and young people with intellectual disabilities are also limited. Hence, the aim  
19 of this cohort study is to compare all-cause and cause-specific mortality in Scotland's school attending  
20 population with and without intellectual disabilities.  
21  
22  
23  
24  
25  
26  
27  
28  
29  
30  
31  
32  
33  
34  
35  
36  
37  
38  
39  
40  
41  
42  
43  
44  
45  
46  
47  
48  
49  
50  
51  
52  
53  
54  
55  
56  
57  
58  
59  
60

## Methods

We used education data from Scotland's annual pupil census between 2008 and 2013, to establish a cohort of children and young people with and without intellectual disabilities. We used individual record linkage based on probabilistic record matching (on date of birth, sex, and postcode,) to the Community Health Index, Scotland's list of all unique patient identifiers, including the National Records for Scotland (NRS) deaths registry, to ascertain all deaths up to February 2015 in Scotland.

The Scottish annual pupil census is completed in September each year and provides information on all children attending Local Authority funded primary, secondary, and special schools in Scotland, or funded placements in alternative schools, which includes 95% of the entire population of children and young people in Scotland. This information includes whether the child has a record of Additional Support Needs, and the type of Additional Support Need. It is held by the Scottish exchange of education data (ScotXed).

The record linkage methodology required date of birth, sex and postcode, however since names were not used to link pupil records to the health data, we excluded non-singleton births (available for Scottish-born pupils only, identified from linkage to maternity records). Unlikely matches were excluded and the most likely match was selected as the correctly linked pupil record. We also excluded any records with duplicate pupil records or where the linkage was tied with another patient. We included in the study all pupils with records of Additional Support Need due to intellectual disabilities between 2008 and 2013, between the ages 4 and 19 years old, upon entry. Pupils were also censored upon reaching aged 25 if they reached this age during the observation period, so that the maximum follow-up age was 24 years old. Only pupils with intellectual disabilities recorded in at least two different school years were included in the intellectual disabilities group, to ascertain that they were correctly identified. Pupils who were included in at least two pupil censuses over the study period and had no record of intellectual disabilities or autism were used as the comparison group. Pupils with solely autism were also excluded from controls, to eliminate potential mislabelling of support need for either autism or learning disability in the absence of clinical diagnoses.

The pupil census also includes data on age, sex, ethnicity and Scottish Index of Multiple Deprivation 2012 (SIMD)[14]. Derived from individual pupil postcode of residence, SIMD is a composite of seven indices to indicate the extent of neighbourhood deprivation. SIMD was divided into quintiles according to the general population. Data on disability requirements including physical (e.g. visual, hearing, or physical impairments), communication, or curriculum needs are also listed.

1  
2  
3 Non-modifiable descriptive data on sex, ethnicity and SIMD, were taken from each pupils' first year in  
4 the census. For disability requirements, all records across multiple pupil census years were used to  
5 define whether having ever received adaptation requirements. Explorative statistical analysis using t-  
6 tests and  $\chi^2$ -tests were employed to investigate characteristics of pupils with intellectual disabilities  
7 compared to their peers in the comparison group. Differences in age of death were explored using t-  
8 tests. Crude mortality rates were calculated using the censor date, 13 February 2015 or date of death.  
9 Since only those pupils who attended school in at least two years over our observed study period were  
10 eligible, the period between the first and second record introduced an immortal time bias, where no  
11 deaths could have occurred, and therefore the entry to the study was defined as the date of their  
12 second pupil census record. For indirect standardisation, observed deaths were assumed to be  
13 independent and vary with the Poisson distribution. The mortality rates were indirectly standardised  
14 for both males and females using the expected age-specific mortality rates per one-year age-group,  
15 using STATA's "strate" command, to calculate age- and sex-standardised mortality ratios (SMRs) for  
16 pupils with versus without intellectual disabilities. 95% confidence intervals were calculated based on  
17 the quadratic approximation of the log likelihood. Expected rates were calculated using fixed age and  
18 sex-specific rates, from the large control population. The SMRs were subsequently calculated stratified  
19 by age, into childhood (aged 5-14 years) and young people (aged  $\geq 15$  years), and by sex. The SMRs  
20 were also calculated for all deaths excluding from external causes. This was to investigate whether the  
21 over-representation of female deaths in people with intellectual disabilities compared to the general  
22 population[12, 15-16] is related to the large proportion of male deaths from external causes in the  
23 general population[17].

24  
25  
26 For all-cause mortality, Kaplan-Meier survival curves were plotted for the overall time period for both  
27 groups. Cox-proportional hazards models are also presented, adjusted for age and sex.

28  
29  
30 For cause of death analyses, the underlying cause of death is defined internationally[18] as the disease  
31 or injury which initiated the chain of morbid events leading directly to death, or the accident/act which  
32 produced the fatal injury. We also used a broader definition to analyse all-contributing causes, that  
33 included all deaths, with any mention on the death certificate related to the cause; combining both  
34 the underlying cause, with secondary, or contributing factors. While the same ICD 10 codes are used,  
35 it is important to note that one death may have several other, additional causes as contributing  
36 factors, all of which are counted in figures reporting "all-contributing causes".

37  
38  
39 For the underlying causes of death, the total number of deaths in each ICD 10 chapter were collated,  
40 and this was then repeated for specific causes listed within chapters. Any errors or ambiguous deaths  
41 were listed as an unknown cause. All deaths where the underlying cause was ill-defined; defined by



1  
2  
3 ICD 10 WHO guidelines[18] as codes in Chapter 18 excluding R95, were also re-classified as  
4 “unknown”. Next, the breakdown of all-contributing causes were analysed, by collating number of  
5 deaths in each ICD 10 chapter. For cause-specific SMRs, indirect age-standardisation was also  
6 performed, but using expected rates per 5-year age-bands to age-standardise rates and robust  
7 standard errors were used. For categories which had fewer than ten deaths, no calculation was  
8 attempted due to lack of reliability in the small number of deaths. Furthermore, in keeping with the  
9 ONS mortality methodology[19], all mortality rates based on between ten and twenty deaths were  
10 labelled as unreliable. The Office of National Statistics (ONS) revised definition of avoidable mortality  
11 for children and young people[20] defined avoidable mortality as either amenable mortality  
12 (avoidable through good quality healthcare even after a condition has developed) or preventable  
13 mortality (avoidable through incidence reduction via public health interventions) or both. This list of  
14 ICD 10 causes was used to determine the occurrence of avoidable deaths. The rates and age-  
15 standardised mortality ratios (age-standardised using 5-year age-bands) for avoidable, amenable, and  
16 preventable mortality were calculated using robust errors, except where there were fewer than ten  
17 deaths per chapter. In keeping with the ONS avoidable mortality methodology[19], all mortality rates  
18 based on fewer than twenty deaths were labelled as unreliable.

### 31 *Sensitivity analysis*

32 A sensitivity analysis was carried out using wider inclusion criteria from the education data for both  
33 groups; the intellectual disabilities group included all pupils with at least one record of support at  
34 school due to intellectual disabilities. The control group included all pupils with at least one census  
35 record, and without support records for intellectual disabilities or autism. There were no other  
36 methodological changes made to age standardising process or censor dates, but entry date was  
37 changed to the date of the first record of support need for pupils with intellectual disabilities or the  
38 first census date for pupils without intellectual disabilities.

39 All statistical analyses were undertaken using Stata, version 15.0 (StataCorp).

### 46 *Personal and Patient involvement*

47  
48 This study was undertaken in the Scottish Learning Disabilities Observatory due to the growing  
49 concern among people with intellectual disabilities and their families around mortality. Its steering  
50 group includes people with intellectual disabilities, and partners from third sector organisations.  
51 Results from this study will be disseminated to people with intellectual disabilities and their families  
52 in an easy-read version via the Scottish Learning Disabilities Observatory website and newsletters.  
53  
54  
55  
56  
57  
58  
59  
60

## Results

Out of 947,922 pupils in the census between 2008 and 2013 who were successfully linked to health records, there were 27,140 pupils who had ever registered as having an Additional Support Needs due to intellectual disabilities, and of these, 18,278 (1.9% of pupils) met the criteria of having at least two records of support. The remaining 8,862 pupils with a single support record were excluded, except for the sensitivity analysis. There were 909,688 pupils without any records of intellectual disabilities or autism. Of these, 131,776 were excluded due to appearing in only one year of the census, except for the sensitivity analysis. The remaining 777,912 pupils attended school for at least two years over the study period and were designated as controls.

Using data from the pupils' first year in the Census, pupils with intellectual disabilities were more likely to be male, and more likely to reside in areas of greater neighbourhood deprivation, and to have been registered for free school meals, compared to their peers (Table 1). Pupils with intellectual disabilities were also more likely to require adaptations in school, including physical adaptations, communication and curriculum adaptations. The majority of the study population were identified as having white (white -Scottish, -British or -other) ethnicity.

### *Missing education support records*

There were 11,329 pupils (62%) of the intellectual disabilities group who appeared in certain census years without having a record of support. The majority, 70%, (n=7,970) were before the accrual of the first record; these pupils had a median 2 pupil census records prior to receiving their support (interquartile range (1,3)). There were 3,359 pupils or 18% of the entire study group who went on to have census records without support records, after having received intellectual disabilities support provision. These pupils had a median 1 subsequent year (IQR 1,2) without support, out of a median 4 remaining years (IQR 3,6) in the census.

Table 1. Demographic information for pupils with, and without intellectual disabilities

| Demographic information <sup>a</sup>        | Intellectual disabilities |          | Controls  |             | p-value* |
|---------------------------------------------|---------------------------|----------|-----------|-------------|----------|
| <b>Total, n (person-years)</b>              | 18,278                    | (67,342) | 777,912   | (3,672,224) |          |
| <b>Male sex, n (%)</b>                      | 11,891                    | (65%)    | 389,160   | (50%)       | p <0.001 |
| <b>Age, person-years</b>                    |                           |          |           |             |          |
| <10                                         | 12,518                    | (19%)    | 995,297   | (27%)       |          |
| 10-14                                       | 28,297                    | (42%)    | 1,332,123 | (36%)       |          |
| 15-19                                       | 23,672                    | (35%)    | 1,178,608 | (32%)       |          |
| 19-24                                       | 2,855                     | (4%)     | 166,196   | (5%)        |          |
| <b>Disability adaptations, n (%)</b>        |                           |          |           |             |          |
| Physical adaptation, ever received          | 1,971                     | (11%)    | 1,837     | (0.2%)      | p <0.001 |
| Curriculum adaptation, ever received        | 6,623                     | (36%)    | 6,341     | (0.8%)      | p <0.001 |
| Communication adaptation, ever received     | 3,553                     | (19%)    | 1,760     | (0.2%)      | p <0.001 |
| <b>SIMD quintile, n (%) at first census</b> |                           |          |           |             |          |
| 1 (most deprived)                           | 5,822                     | (32%)    | 169,038   | (22%)       |          |
| 2                                           | 3,888                     | (21%)    | 149,290   | (19%)       |          |
| 3                                           | 3,397                     | (19%)    | 152,415   | (20%)       |          |
| 4                                           | 2,896                     | (16%)    | 158,228   | (20%)       |          |
| 5 (least deprived)                          | 2,275                     | (12%)    | 148,941   | (19%)       | p <0.001 |
| <b>Ethnicity, n (%)</b>                     |                           |          |           |             |          |
| White <sup>b</sup>                          | 16,553                    | (91%)    | 708,941   | (91%)       | p <0.001 |
| Asian <sup>b</sup>                          | 514                       | (3%)     | 23,791    | (3%)        |          |
| Mixed or multiple ethnicities               | 144                       | (1%)     | 8,035     | (1%)        |          |
| African, Caribbean or black                 | 87                        | (<1%)    | 4,710     | (<1%)       |          |
| Other ethnic groups                         | 92                        | (<1%)    | 4,665     | (<1%)       |          |
| Not disclosed / or unknown                  | 888                       | (5%)     | 27,770    | (4%)        |          |

<sup>a</sup> Data taken from first census record, except for disability adaptation which includes any record across census years.

\*  $\chi^2$ -test for intellectual disabilities compared to control group (For SIMD -  $\chi^2$  test was across all categories, overall p value)

<sup>b</sup> (white -Scottish, -British, -Other) (Asian -Indian/British/Scottish, -Pakistani/British/Scottish, -Bangladeshi/British/Scottish, -Chinese/British/Scottish)

### *Mortality analysis*

Linking the pupil census population to the NRS registry of deaths up to February 2015 resulted in the equivalent of 3,739,568 person-years of follow up. There were 564 deaths identified in the study population during this period. There were 106 deaths (0.6%) among children and young people with intellectual disabilities over 67,342 person-years, which translated to a crude mortality rate of 157 deaths per 100,000 person-years (95% CI 130, 190). In the control group, there were 458 deaths (<0.1%) over 3,672,224 person-years, which translated to a crude mortality rate of 12 deaths per 100,000 person-years (95% CI 11, 14). The mean age of death among children and young people with intellectual disabilities was 14.3 years (95% CI 13.4 to 15.1) which was significantly lower ( $p<0.001$ ) than controls where the mean age of death was 16.1 years (15.8 to 16.5). Sixty-two percent of deaths among children with intellectual disabilities occurred in males which was equivalent to the sex distribution in the whole intellectual disabilities cohort ( $p=0.545$ ). Among controls, 61% of deaths occurred in males in spite of them accounting for only 50% of this group ( $p<0.001$ ). Over 50% of deaths among pupils with intellectual disabilities occurred during childhood (<15 years old), compared to 29% of deaths among controls.

The all-cause age- and sex- SMR was 11.6 (95% CI 9.6, 14.0), as shown in Figure 1. The SMR was higher for female pupils than male pupils with intellectual disabilities; female SMR 16.6 (12.2, 22.6) versus male SMR 9.8 (7.7, 12.5). Exclusion of external causes of death resulted in a considerable increase in the all-cause SMR for both females and males with intellectual disabilities; overall SMR was 21.6 (17.8, 26.3), female SMR 25.6 (18.8, 34.9) versus male SMR 19.6 (15.3, 25.2). This produced a relative increase of 10 more deaths overall for pupils with versus without intellectual disabilities, which was similar in females (+9.0 increase), and males (+9.8 increase). The childhood (aged 5-14 years) SMR was 21.6 (16.6, 28.2) and was higher for females than males with intellectual disabilities; female SMR 30.3 (19.8, 46.5) versus male SMR 18.4 (13.1, 25.7). For young people ( $\geq 15$  years old) SMR was 7.7 (5.9, 10.2) and was also higher for females than males with intellectual disabilities; female SMR 11.1 (7.1, 17.4) versus male SMR 6.5 (4.6, 9.3). Hence, the difference from the control pupils was greater in children rather than young people for both females and males.

The Cox-proportional hazards ratio for all-cause mortality, adjusted for age and sex, was found to be very similar; HR : 11.97 (9.64, 14.86). Proportional hazards assumption was met ( $p=0.4217$ ). Kaplan-Meier survival curves for the overall time period are found in online supplementary data (Appendix 2).

1  
2  
3 - Insert Figure 1 about here -  
4

### 5 *Cause of Death*

6  
7  
8 Cause of death data was available for over 95% of deaths among pupils with intellectual disabilities  
9 and over 91% deaths among controls. Table 2 shows the underlying causes of death and all-  
10 contributing causes of death by ICD 10 chapter. There were major differences between pupils with  
11 intellectual disabilities and controls with regards to the most common underlying causes. Among  
12 pupils with intellectual disabilities, these were diseases of the nervous system (33%), congenital  
13 malformations, deformations and chromosomal abnormalities (22%), followed by nutritional,  
14 metabolic and endocrine diseases (8%), of which most were conditions which were the cause of the  
15 pupils' intellectual disabilities e.g. neuronal ceroid lipofuscinosis or ornithine metabolism disorders.  
16 These were followed by respiratory diseases (8%) and neoplasms (7%). The most common underlying  
17 cause of death among control pupils was deaths due to external causes (46%), which made up a higher  
18 proportion of all deaths than in the pupils with intellectual disabilities (5%). Among controls, 71% of  
19 deaths due to external causes occurred in boys, compared with 100% in the intellectual disabilities  
20 group.  
21  
22

23  
24  
25 There were also differences in the most common all-contributing causes of death (Table 2). These  
26 chapters were not mutually exclusive, since one death could be included in several categories. Of the  
27 106 deaths among pupils with intellectual disabilities, diseases of the nervous system contributed to  
28 56 and diseases of the respiratory system contributed to 55. The 56 diseases of the nervous system  
29 included 34 due to cerebral palsy and 16 due to epilepsy. The 55 diseases of the respiratory system  
30 included 27 due to pneumonia, 9 due to pneumonitis associated with food and vomit, 17 due to  
31 respiratory failure, and 15 other respiratory disorders. In comparison, the control pupils had diseases  
32 of the nervous system contributing to 39 out of the total 458 deaths, and diseases of the respiratory  
33 system contributing to 51 of 458 deaths which included 21 due to pneumonia. The most common all-  
34 contributing causes of death for the control pupils were, as found for the underlying cause, external  
35 causes at 50% compared with 15% amongst pupils with intellectual disabilities.  
36  
37  
38  
39  
40  
41  
42  
43  
44  
45  
46  
47  
48

49 Table 2 reports these data by presenting the cause-specific crude mortality rates by ICD 10 chapter  
50 for all pupils. As recommended by the ONS[19], avoidable mortality rates based on low numbers are  
51 labelled as unreliable and marked "U" or U.  
52  
53  
54  
55  
56  
57  
58  
59  
60

**Table 2. By ICD 10 chapter, the underlying causes of death as well as all-contributing factors in death, and cause-specific crude mortality rates per 100,000 person-years for pupils with, and without intellectual disabilities**

| ICD chapter <sup>a</sup>                                                              | Underlying cause of death |      |        |      |                       |                  |        |     |  | All-contributing factors in death |                   |        |          |              |                  |     |     |
|---------------------------------------------------------------------------------------|---------------------------|------|--------|------|-----------------------|------------------|--------|-----|--|-----------------------------------|-------------------|--------|----------|--------------|------------------|-----|-----|
|                                                                                       | Intellectual disabilities |      |        |      | Controls              |                  |        |     |  | Intellectual disabilities         |                   |        | Controls |              |                  |     |     |
|                                                                                       | n (%)                     | CMR  | 95% CI |      | n (%)                 | CMR              | 95% CI |     |  | n                                 | CMR               | 95% CI | n        | CMR          | 95% CI           |     |     |
| Ch. 6. Diseases of the nervous system                                                 | <b>35 (33%)</b>           | 51.9 | 37.3   | 72.4 | <b>19 (4%)</b>        | 0.5 <sup>U</sup> | 0.3    | 0.8 |  | <b>56</b>                         | 83.2              | 64.0   | 108.1    | <b>39</b>    | 1.1              | 0.8 | 1.5 |
| Ch. 17. Congenital malformations, deformations & chromosomal abnormalities            | <b>23 (22%)</b>           | 34.2 | 22.7   | 51.4 | <b>13 (3%)</b>        | 0.4 <sup>U</sup> | 0.2    | 0.6 |  | <b>32</b>                         | 47.5              | 33.6   | 67.2     | <b>18</b>    | 0.5 <sup>U</sup> | 0.3 | 0.8 |
| Ch. 4. Endocrine, nutritional & metabolic diseases                                    | <b>9 (8%)</b>             |      |        |      | <b>15 (3%)</b>        | 0.4 <sup>U</sup> | 0.2    | 0.7 |  | <b>11</b>                         | 16.3 <sup>U</sup> | 9.0    | 29.5     | <b>18</b>    | 0.5 <sup>U</sup> | 0.3 | 0.8 |
| Ch. 10. Diseases of the respiratory system                                            | <b>8 (8%)</b>             |      |        |      | <b>17 (4%)</b>        | 0.5 <sup>U</sup> | 0.3    | 0.7 |  | <b>55</b>                         | 81.7              | 62.7   | 106.4    | <b>51</b>    | 1.4              | 1.1 | 1.8 |
| Ch. 2. Neoplasms                                                                      | <b>7 (7%)</b>             |      |        |      | <b>92 (20%)</b>       | 2.5              | 2.0    | 3.1 |  | <b>8</b>                          | Na                |        |          | <b>94</b>    | 2.6              | 2.1 | 3.1 |
| Ch. 20. External causes of morbidity & mortality                                      | <b>5 (5%)</b>             |      |        |      | <b>210 (46%)</b>      | 5.7              | 5.0    | 6.6 |  | <b>16</b>                         | 23.8 <sup>U</sup> | 14.6   | 38.8     | <b>231</b>   | 6.3              | 5.5 | 7.2 |
| Ch. 9. Diseases of the circulatory system                                             | <b>&lt;5 (5%)</b>         |      |        |      | <b>24 (5%)</b>        | 0.7              | 0.4    | 1.0 |  | <b>15</b>                         | 22.3 <sup>U</sup> | 13.4   | 37.0     | <b>54</b>    | 1.5              | 1.1 | 1.9 |
| Ch. 11. Diseases of the digestive system                                              | <b>&lt;5 (5%)</b>         |      |        |      | <b>6 (1%)</b>         |                  |        |     |  | <b>13</b>                         | 19.3 <sup>U</sup> | 11.2   | 33.3     | <b>11</b>    | 0.3 <sup>U</sup> | 0.2 | 0.5 |
| Ch. 1. Certain Infectious & parasite diseases                                         | <b>&lt;5 (5%)</b>         |      |        |      | <b>12 (3%)</b>        | 0.3              | 0.2    | 0.6 |  | <b>8</b>                          |                   |        |          | <b>29</b>    | 0.8              | 0.5 | 1.1 |
| Ch. 5. Mental and behavioural disorders                                               | <b>&lt;5 (5%)</b>         |      |        |      | <b>&lt;5 (1%)</b>     |                  |        |     |  | <b>6</b>                          |                   |        |          | <b>17</b>    | 0.5 <sup>U</sup> | 0.3 | 0.7 |
| Ch. 3. Diseases of the blood, blood-forming organs & immune mechanism                 | <b>&lt;5 (5%)</b>         |      |        |      | <b>&lt;5 (1%)</b>     |                  |        |     |  | <b>&lt;5</b>                      |                   |        |          | <b>8</b>     |                  |     |     |
| Ch.14. Diseases of the genitourinary system                                           | <b>&lt;5 (5%)</b>         |      |        |      | <b>&lt;5 (1%)</b>     |                  |        |     |  | <b>&lt;5</b>                      |                   |        |          | <b>&lt;5</b> |                  |     |     |
| Ch. 13. Diseases of the musculoskeletal system & connective tissue                    | <b>0</b>                  |      |        |      | <b>&lt;5 (1%)</b>     |                  |        |     |  | <b>&lt;5</b>                      |                   |        |          | <b>7</b>     |                  |     |     |
| Ch. 8. Diseases of the ear & mastoid process                                          | <b>&lt;5 (5%)</b>         |      |        |      | <b>0</b>              |                  |        |     |  | <b>&lt;5</b>                      |                   |        |          | <b>0</b>     |                  |     |     |
| Ch. 15. Pregnancy, childbirth & puerperium                                            | <b>0</b>                  |      |        |      | <b>&lt;5 (1%)</b>     |                  |        |     |  | <b>0</b>                          |                   |        |          | <b>&lt;5</b> |                  |     |     |
| Ch. 18. Symptoms, signs & abnormal clinical and laboratory findings <sup>b</sup>      | <b>Na</b>                 |      |        |      | <b>Na<sup>b</sup></b> |                  |        |     |  | <b>28</b>                         |                   |        |          | <b>76</b>    |                  |     |     |
| Ch.19. Injury, poisoning & certain other consequences of external causes <sup>b</sup> | <b>Na</b>                 |      |        |      | <b>Na<sup>b</sup></b> |                  |        |     |  | <b>10</b>                         |                   |        |          | <b>219</b>   |                  |     |     |
| Unknown cause or error in underlying code                                             | <b>5 (5%)</b>             |      |        |      | <b>39 (9%)</b>        |                  |        |     |  | <b>Na</b>                         |                   |        |          | <b>Na</b>    |                  |     |     |
| <b>TOTAL</b>                                                                          | <b>106</b>                |      |        |      | <b>458</b>            |                  |        |     |  | <b>Na</b>                         |                   |        |          | <b>Na</b>    |                  |     |     |

<sup>a</sup>n<5 repressed due to statistical disclosure CMR=crude mortality rate -reported for ≥10 deaths <sup>U</sup> Rates based on 10 - 20 deaths labelled “U” or unreliable

1  
2  
3 The top 10 individual leading causes of death are shown in table 3. Among pupils with intellectual  
4 disabilities, the highest number of individual underlying cause of deaths were cerebral palsy (18%),  
5 followed by congenital brain deformities (8%), and neoplasms (7%). Where there were fewer than five  
6 individual deaths per cause, these causes were not reported due to statistical disclosure control. For  
7 the majority of deaths in pupils with intellectual disabilities this was the case; 85% of specific causes  
8 could not be disclosed. Among control pupils, the highest number of individual underlying cause of  
9 deaths were neoplasms (20%), and road traffic accidents (17%). In relation to their peers, only three  
10 of the top ten underlying causes of death among children with intellectual disabilities featured in the  
11 top ten list for the controls – neoplasms (7% vs 20% of controls), epilepsy (5% vs 2% controls), and  
12 accidents (non-road traffic related, <5% vs 9% controls).  
13  
14  
15  
16  
17  
18  
19  
20  
21  
22  
23  
24  
25  
26  
27  
28  
29  
30  
31  
32  
33  
34  
35  
36  
37  
38  
39  
40  
41  
42  
43  
44  
45  
46  
47  
48  
49  
50  
51  
52  
53  
54  
55  
56  
57  
58  
59  
60

1  
2  
3  
4  
5  
6  
7  
8  
9  
10  
11  
12  
13  
14  
15  
16  
17  
18  
19  
20  
21  
22  
23  
24  
25  
26  
27  
28  
29  
30  
31  
32  
33  
34  
35  
36  
37  
38  
39  
40  
41  
42  
43  
44  
45  
46

**Table 3. The top ten specific underlying causes of death, and all-contributing causes of death, for pupils with, and without intellectual disabilities**

| Intellectual disabilities      |    |                                   |    | Controls                      |    |                                  |     |
|--------------------------------|----|-----------------------------------|----|-------------------------------|----|----------------------------------|-----|
| Underlying cause of death      | n  | All-contributing factors          | n  | Underlying cause of death     | n  | All-contributing factors         | n   |
| Cerebral palsy                 | 19 | Cerebral palsy                    | 34 | All neoplasms                 | 92 | Signs and symptoms: injury       | 114 |
| Brain deformity                | 9  | Pneumonia                         | 27 | Traffic accident              | 76 | All neoplasms                    | 94  |
| All neoplasms                  | 7  | Respiratory failure               | 17 | Self-harm                     | 54 | Traffic accidents                | 76  |
| Muscular dystrophy             | 6  | Epilepsy                          | 16 | Accidents, other              | 41 | Self-harm                        | 54  |
| Epilepsy                       | 5  | Respiratory disorders             | 15 | External, undetermined intent | 25 | Signs and symptoms: asphyxiation | 51  |
| Chromosomal abnormalities      | 5  | Brain deformity                   | 12 | Asthma                        | 14 | Accident, other                  | 43  |
| Neuronal ceroid lipofuscinosis | <5 | Chromosomal abnormalities         | 10 | Assault                       | 13 | Signs and symptoms: poisoning    | 29  |
| Pneumonia including influenza  | <5 | Pneumonitis due to food and vomit | 9  | Infections                    | 12 | All infections                   | 29  |
| Congenital heart disease       | <5 | All neoplasms                     | 8  | Epilepsy                      | 8  | External, undetermined intent    | 26  |
| Accidents, other               | <5 | All infections                    | 8  | Cystic fibrosis               | 8  | Pneumonia                        | 21  |
| Unknown causes                 | 5  | Ill-defined or ambiguous death    | 8  | Unknown causes                | 39 | Ill-defined or ambiguous death   | 58  |



1  
2  
3 Cause-specific SMRs, indirectly standardised using five-year age-bands and robust errors, are shown  
4 in Figure 2. For underlying causes, this was only possible for the two largest categories (by ICD 10  
5 chapters); congenital malformations, deformations and chromosomal abnormalities, and diseases of  
6 the nervous system. For the all-contributing causes, the age-SMR for seven chapters were calculated.  
7  
8 For congenital malformations, deformations and chromosomal abnormalities the SMR was 98.8<sup>u</sup>  
9 (69.9, 139.7), and for diseases of the nervous system, was 76.5 (58.9, 99.4). The ratios were also high  
10 for diseases of the digestive system at 63.7<sup>u</sup> (37.0, 109.7); and for diseases of the respiratory system  
11 at 55.3 (42.5, 72.1). Despite external causes contributing to a larger proportion of deaths among the  
12 control group, the mortality rate was still higher in the intellectual disabilities group than in the  
13 controls; the crude rate was 23.8<sup>u</sup> per 100,000 person-years, compared to 6.3<sup>u</sup> per 100,000 for the  
14 controls for external cause of death (either as the underlying cause or as a contributing factor). This  
15 produced an SMR of 3.6<sup>u</sup> (2.2, 5.8) demonstrating there is considerable over-representation in the  
16 intellectual disabilities group versus the controls.  
17  
18  
19  
20  
21  
22  
23  
24

25 - Insert Figure 2 about here -  
26  
27

#### 28 *Avoidable mortality*

29  
30 According to the UK ONS definition of avoidable mortality, (deaths which are amenable, preventable,  
31 or both), 19% of deaths in the intellectual disabilities cohort were classed as avoidable; 15% of deaths  
32 were amenable to treatment, and 6% were preventable. The majority of avoidable deaths (80%) were  
33 considered amenable to treatment, for their age group, including epilepsy, pneumonia and  
34 neoplasms. Among the control pupils, 63% of deaths were classed as avoidable, 16% were amenable  
35 to treatment, and 48% were preventable. The crude avoidable mortality rate for pupils with  
36 intellectual disabilities was higher, at 29.7<sup>u</sup> (19.2, 46.0) per 100,000 in pupils with intellectual  
37 disabilities, compared to 7.8 (7.0, 8.8) per 100,000 in the control pupils. The SMR was 3.6<sup>u</sup> (2.3, 5.5).  
38 Further breakdown of avoidable rates was possible for deaths that were amenable to healthcare; in  
39 the intellectual disabilities group, the amenable mortality rate was 23.8<sup>u</sup> (14.6, 38.8) per 100,000  
40 versus 2.0<sup>u</sup> (1.6, 2.5) per 100,000 in controls; and the SMR was found to be 11.5<sup>u</sup>, (7.0, 18.8).  
41  
42  
43  
44  
45  
46  
47  
48

49 Among pupils with intellectual disabilities, there were additional causes of death that the authors of  
50 this paper consider would have been amenable to health care: aspiration pneumonia; otitis media;  
51 megacolon; gastrointestinal haemorrhage; gastroenteritis; and contributing causes of death including  
52 gastro-oesophageal reflux, and urinary tract infections. These are not currently included within the  
53 ONS list of underlying causes.  
54  
55  
56  
57  
58  
59  
60

### *Sensitivity Analysis*

Of 27,140 pupils with at least one record of support due to intellectual disabilities, 65% were male, and compared to the main analysis group, there were significant reductions in frequency of school adaptations (physical disability reduced from 11% vs 9%, ( $p<0.001$ ), curriculum adaptations from 36% to 31% ( $p<0.001$ ), and communication adaptations from 19% to 16% ( $p<0.001$ ). There were higher numbers of pupils in this group with years without intellectual disabilities support. There were 156 deaths in the intellectual disabilities group (134 per 100,000 person-years [114.2, 156.3]) compared to 684 deaths (13.8 per 100,000 [12.8, 14.8]) amongst the control group. The SMR for this sensitivity analysis was 9.5 (95% CI 8.1, 11.1), a change of minus 2 excessive deaths compared to the main analysis SMR. Mean age of death was similar in the sensitivity group, being 14.4 years (13.7, 15.1) in the intellectual disabilities group, and 16.2 (15.9, 16.5) in the control group. The ratio of deaths by sex were also very similar, with no difference for the intellectual disabilities group; 61% deaths were in males, similar to the proportion of males in the group ( $p=0.306$ ), and an increase in male deaths amongst controls; 63% deaths were in males, whereas only 50% in the control group were male ( $p<0.001$ ).

## Discussion

### *Principle findings and interpretation*

Our study is one of very few that has reported mortality rates among children and young people with intellectual disabilities, and is highly novel in reporting underlying, all-contributing, and the most common individual causes of death at this age, including cause-specific SMRs. We have demonstrated that children and young people in Scotland with intellectual disabilities have a 12-fold risk of death compared to their peers, rising to 22-fold on excluding external causes. Pupils with intellectual disabilities were also over-represented in deaths that were amenable to healthcare, and were approximately 3.6 times more likely to experience an avoidable death (albeit calculated using unreliably low rates). Children aged 5 -14 years with intellectual disabilities had a higher risk relative to peers (SMR 21.6), than the young people aged  $\geq 15$  years with intellectual disabilities (SMR 7.7). This difference reflects that, in the general population, there were considerably more deaths in young people than in children, especially for males, as opposed to more deaths of children than young people with intellectual disabilities. The SMR was higher for female pupils in both age groups, reflecting the higher death rate of males in the controls. Nervous system and respiratory causes of death were the most common among children and young people with intellectual disabilities, including deaths that would have been amenable to quality health care, such as epilepsy, pneumonia, and pneumonitis due to food and vomit. It is highly important to identify amenable deaths so that actions can be devised and taken. Causes of death among children and young people with intellectual disabilities were higher across several disease categories than for other children and young people, including diseases of the nervous system, digestive system, respiratory system, endocrine, nutrition and metabolic diseases, diseases of the circulatory system, and external causes.

Previous studies have demonstrated that there is an increased risk of sudden unexpected death in epilepsy among people with intellectual disabilities, however, in our study, the majority of deaths which listed epilepsy as a contributing factor, also listed pneumonia, so this does not appear to account for our findings.

Whilst external causes of deaths accounted for the greatest proportion of deaths among control children and young people (46%), especially in males, we found that external causes of death were still over-represented among children and young people with intellectual disabilities compared with their controls (partly due to inhalation of gastric contents, and inhalation of objects obstructing breathing). Trollor et al. (2017)[17] hypothesised that higher SMRs in adult women than men with intellectual disabilities may be driven by the larger proportion of male deaths in the general population due to external causes; and the lack of equivalent deaths in males with intellectual disabilities.

1  
2  
3 However, in our population of children and young people, when we re-calculated SMRs to exclude  
4 external causes, the observed increase in risk for females remained. Hence at this age range, this is  
5 only a partial explanation for the sex differences in SMRs, and there are further risk factors and  
6 vulnerabilities which require further exploration. It should be noted however, that in children and  
7 young people with intellectual disabilities, not all studies report a higher SMR in females compared  
8 with males[10, 11].  
9

#### 14 *Comparison with previous studies*

16 Two previous studies[9, 12] have reported a higher SMR for children than for young people. Glover et  
17 al. 2017[9] reported results separately for children aged 0-9 years, (SMR 30.4) and young people aged  
18 10-17 years with intellectual disabilities (SMR 17.3). The Australian study by Bourke et al. 2017[12]  
19 reported a higher adjusted Hazard Ratio (aHR) for children aged 6-10 years (aHR 12.6) than young  
20 people aged 11-25 years (aHR 4.9). The SMRs we report are lower than those reported by Glover et  
21 al. (2017)[9], but the extent of difference between the children and young people is similar, albeit for  
22 differently defined age groups. The confidence intervals reported in our study are narrower due to  
23 the larger sample size. The SMRs we report are higher than those previously reported from small scale  
24 studies in Finland and USA[8, 10, 15], and a larger one in the Republic of Ireland[16], yet lower than a  
25 study reported from England[9], and a small study in Canada[11]. These differences may be due to  
26 actual international differences, or due to methodological differences between studies including: the  
27 method and source of identification of the population with intellectual disabilities; age ranges  
28 included; and study size with several of the previous studies having produced results with wide  
29 confidence intervals. All of these studies report a higher SMR in females than in males, except the  
30 study conducted in Canada and one in Finland.  
31

32  
33  
34  
35  
36  
37  
38  
39  
40  
41  
42 The only previous study that has reported cause of death for children and young people aged 1-25  
43 years, reported the most common causes of death to be infections in 50% (particularly respiratory  
44 infections in 34%), birth defects in 19% (particularly cardiac defect in 15%), and accidents in 11%,  
45 although by ICD 10 chapter deaths due to diseases of the respiratory tract were reported for 4.6%,  
46 infections and parasitic diseases were 3.1%, and external causes were 7.7%; and the most common  
47 were congenital malformations, deformations and chromosomal abnormalities in 29.1%, and diseases  
48 of the nervous system in 27.6%[12]. They did not report cause-specific SMRs by ICD 10 chapters, but  
49 crude numbers were proportionally higher for the children with intellectual disabilities for diseases of  
50 the nervous system, endocrine, nutritional and metabolic diseases, and congenital malformations, and  
51 lower for conditions originating in the perinatal period, external causes, or injury or poisoning[12]. We  
52 demonstrated diseases of the nervous system and respiratory system to be the most common causes  
53  
54  
55  
56  
57  
58  
59  
60

1  
2  
3 of death, and that cause-specific SMRs were raised across all of congenital malformations,  
4 deformations and chromosomal abnormalities, diseases of the nervous system, digestive system,  
5 respiratory system, endocrine, nutrition and metabolic diseases, circulatory system, and external  
6 causes.  
7  
8  
9

10 Glover et al. (2017) graphed avoidable deaths in his study of children and adults[9]. We are unaware  
11 of any previous studies numerically quantifying amenable deaths among children and young people  
12 with intellectual disabilities.  
13  
14

### 15 16 *Strengths and limitations*

17  
18 Our study drew upon data from an entire country, collected annually, and linked to national death  
19 records. It was large in scale, including over 18,000 children and young people with intellectual  
20 disabilities, and a large control population. A record of intellectual disabilities at school brings an  
21 entitlement to additional support so is likely to drive good recording in high income countries like  
22 Scotland. However, it only uses a binary definition for intellectual disabilities, therefore the study  
23 could not investigate mortality among people with different causes and severities of intellectual  
24 disabilities. Our study was not large enough to delineate cause-specific mortality ratios by sex, nor to  
25 study whether there are any ethnic variations. Use of death certificate data is known to have  
26 limitations[19], including inconsistent reporting and no reporting of severity of conditions. There may  
27 be some diagnostic overshadowing in death certificate data for people with intellectual disabilities,  
28 obscuring the events leading to death[21-23]. The ONS list of avoidable deaths does not include some  
29 that appear important among children and young people with intellectual disabilities, such as  
30 aspiration pneumonia, otitis media, megacolon, gastrointestinal haemorrhage, gastroenteritis, which  
31 featured as an underlying cause of death in our data. Additionally, death certificate data does not  
32 include wider determinants of health and death that may be implicated, such as being the target of  
33 discrimination or neglect.  
34  
35  
36  
37  
38  
39  
40  
41  
42  
43  
44

45  
46 Additionally, while we believe this population to be highly representative of children with intellectual  
47 disabilities across Scotland, we acknowledge that we were unable to access data on children not in  
48 school; there may be some under-ascertainment of children with intellectual disabilities with  
49 exceptional and complex health needs unable to attend school.  
50  
51

### 52 53 *Conclusions and future directions*

54  
55 It is extremely important to study deaths among children and young people with intellectual  
56 disabilities, especially as so few studies have previously done so. Amongst the studies that have, there  
57 exists wide variation in the extent of reported inequality compared to other children and young  
58 people.  
59  
60

1  
2  
3 people, and wide confidence intervals, but all show a higher SMR. Our large study provides robust  
4 data that quantifies the extent of the difference; children and young people have a 12 times higher  
5 risk of death. A larger body of research exists for adults (rather than children and young people) with  
6 intellectual disabilities, and demonstrates substantial inequalities, and a high proportion of amenable  
7 deaths that could be addressed via reasonable adjustments in care provision. In our study, we have  
8 now reported that children and young people with intellectual disabilities also experience inequalities  
9 and experience amenable deaths. This is important, and we need a better understanding of it so that  
10 targeted improvements in care can start to be developed and delivered to reduce this inequality.  
11 Heslop et al (2014)[24] conducted a confidential inquiry into deaths of people with intellectual  
12 disabilities and made recommendations for improvements to practice regarding respiratory deaths,  
13 including aggressive monitoring and treatment of gastro-oesophageal reflux as well as postural and  
14 physical therapies. We have found that this is also important for children and young people with  
15 intellectual disabilities, if we are serious about improving life expectancy. Additionally, Scotland now  
16 offers influenza vaccines to all primary school aged children to reduce pneumonia; we therefore need  
17 to understand uptake by children with intellectual disabilities, and its determinants, to gauge whether  
18 this will change mortality findings.  
19  
20  
21  
22  
23  
24  
25  
26  
27  
28  
29

30 The results of this study should be used to inform and direct multidisciplinary healthcare teams, as  
31 well as educators and carers to the associated risks of mortality in childhood and generate greater  
32 awareness around potential areas of improvement. Our countrywide study had a mean follow-up of  
33 around 5 years, and given that the pupil census is recorded annually, it presents the framework for  
34 further work to investigate both mortality trends in children and young people with intellectual  
35 disabilities, and a more detailed understanding of these. Future studies could consider looking at  
36 predictors of death in children and young people to inform translation of findings into clinical benefit  
37 for people with intellectual disabilities.  
38  
39  
40  
41  
42  
43  
44  
45  
46

47 Acknowledgements: We thank the ScotXed Pupil Census, the National Records of Scotland, and  
48 Information Services Division (ISD) of NHS Scotland for providing data and the eData Research and  
49 Innovation Service team at ISD Scotland for assisting with the data linkage and analysis stage of this project.  
50

51 Contributors: GS analysed the data, interpreted findings and wrote the first draft of the manuscript. MF  
52 developed record linkage, analysed the data, interpreted findings and contributed to the manuscript. JP  
53 developed record linkage, interpreted findings and contributed to the manuscript. DK, AH & CM  
54 interpreted data and contributed to the manuscript, S-AC conceived the study, analysed and interpreted  
55 the data, and contributed to the manuscript. All authors approved the final version of the manuscript.  
56  
57  
58  
59  
60

1  
2  
3 Funding: This study was funded by an MRC Mental Health Data Pathfinder Award (MC\_PC\_17217), and  
4 the Scottish Government via the Scottish Learning Disabilities Observatory.  
5  
6

7 Disclaimer: The funders had no role in the study design, collection, analyses or interpretation of data,  
8 writing the report nor the decision to submit the article for publication.  
9

10 Competing Interests: None declared.  
11  
12

13 Patient Consent: Not required.  
14

15 Ethics approval: This study received approval from the NHS National Services Scotland Privacy Advisory  
16 Committee and Public Benefit and Privacy Panel -(PBPP) approval no. 1617-0259  
17  
18

19 Data sharing statement: This study linked patient information held across several administrative health  
20 datasets within ISD Scotland, with externally held data held by the Scottish Government (ScotXed  
21 education), and National Records of Scotland. Linkage and de-identification of data was performed by the  
22 Information Services Division (ISD) of NHS National Services Scotland (NSS). A data processing agreement  
23 between NHS NSS and University of Glasgow and a data sharing agreement between ScotXed and  
24 University of Glasgow was drafted. The University of Glasgow were authorised to receive record linked  
25 data controlled and held by ISD within NSS, via access through the national safe haven. The ISD Statistical  
26 Disclosure Control Protocol was followed. It is therefore not possible to share data with other parties.  
27  
28  
29  
30  
31  
32  
33  
34  
35  
36  
37  
38  
39  
40  
41  
42  
43  
44  
45  
46  
47  
48  
49  
50  
51  
52  
53  
54  
55  
56  
57  
58  
59  
60

## References

1. Emerson E, Hatton C. Mental health of children and adolescents with intellectual disabilities in Britain. *Br J Psychiatry* 2007;191:493-499.
2. Hughes-McCormack LA, Rydzewska E, Henderson A, et al. Prevalence and general health status of people with intellectual disabilities in Scotland -a total population study. *J Epidemiol Community Health* 2017a;72:78–85.
3. Hughes-McCormack LA, Rydzewska E, Henderson A, et al. Prevalence of mental health conditions and relationship with general health in a whole country population of people with intellectual disabilities compared with the general population. *BJPsych Open* 2017b;3:243-248.
4. Heslop P, Lauer E, Hoghton M. Mortality in people with intellectual disabilities. *J Appl Res Intellect Disabil* 2015;28:367–372.
5. Hosking FJ, Carey IM, Shah SM, et al. Mortality among adults with intellectual disability in England: Comparisons with the general population. *Am J Public Health* 2016;106(8):1483–1490
6. O’Leary L, Cooper SA, Hughes-McCormack LA. Early death and causes of death of people with intellectual disabilities: A systematic review. *J Appl Res Intellect Disabil* 2018a;31:325–342.
7. O’Leary L, Hughes-McCormack LA, Dunn K, et al. Early death and causes of death of people with Down syndrome a systematic review. *J Appl Res Intellect Disabil* 2018b;31(5):687-708
8. Decouflé P, Autry A. Increased mortality in children and adolescents with developmental disabilities. *Paediatr Perinat Epidemiol* 2002;16(4):375–382
9. Glover G, Williams R, Heslop P, et al. Mortality in people with intellectual disabilities in England. *J Intellect Disabil Res* 2017;61(1):62–74
10. Patja K, Mölsä P, Iivanainen M. Cause-specific mortality of people with intellectual disability in a population-based, 35-year follow-up study. *J Intellect Disabil Res* 2001;45:30–40
11. Ouellette-Kuntz H, Shooshtari S, Balogh R, et al. Understanding information about mortality among people with intellectual and developmental disabilities in Canada. *J Appl Res Intellect Disabil* 2015;28(5):423–435
12. Bourke J, Nembhard WN, Wong K, et al. Twenty-Five Year Survival of Children with Intellectual Disability in Western Australia. *J Pediatr* 2017;188:232-239.e2.
13. Durvasula S, Beange H, Baker W. Mortality of people with intellectual disability in northern Sydney. *J Intellect Dev Disabil* 2002;27(4):255–264.
14. Scottish Index of Multiple Deprivation Background and Methodology, Scottish Government Website. <https://www2.gov.scot/Topics/Statistics/SIMD/BackgroundMethodology> (accessed July 2019)
15. Arvio M, Salokivi T, Tiitinen A, et al. Mortality in individuals with intellectual disabilities in Finland. *Brain Behav* 2016;6(2):1–4.
16. McCarron M, Carroll R, Kelly C, et al. Mortality rates in the general Irish population compared to those with an intellectual disability from 2003 to 2012. *J Appl Res Intellect Disabil* 2015;28(5):406–413
17. Trollor J, Srasuebku P, Xu H, et al. Cause of death and potentially avoidable deaths in Australian adults with intellectual disability using retrospective linked data. *BMJ Open* 2017;7:e013489.
18. International Statistical Classification of Diseases and Related Health Problems 10th Revision, Volume 2 Instruction manual, 2010 edition. WHO. [https://www.who.int/classifications/icd/ICD10Volume2\\_en\\_2010.pdf](https://www.who.int/classifications/icd/ICD10Volume2_en_2010.pdf) (accessed July 2019).
19. Office of National Statistics: Avoidable mortality in the UK Quality and Methodology Information. Office of National Statistics 2019. <https://www.ons.gov.uk/peoplepopulationandcommunity/healthandsocialcare/causesofdeath/methodologies/avoidablemortalityinenglandandwalesqmi> (accessed July 2019)



- 1  
2  
3  
4  
5  
6  
7  
8  
9  
10  
11  
12  
13  
14  
15  
16  
17  
18  
19  
20  
21  
22  
23  
24  
25  
26  
27  
28  
29  
30  
31  
32  
33  
34  
35  
36  
37  
38  
39  
40  
41  
42  
43  
44  
45  
46  
47  
48  
49  
50  
51  
52  
53  
54  
55  
56  
57  
58  
59  
60
20. Olatunde O, Windsor-Shellard B, Campbell A. Revised definition of avoidable mortality and new definition for children and young people. Office for National Statistics 2016.  
<https://www.ons.gov.uk/file?uri=/aboutus/whatwedo/statistics/consultationsandsurveys/allconsultationsandsurveys/reviewofavoidablemortalitydefinition/reviseddefinitionofavoidablemortalityandnewdefinitionforchildrenandyoungpeople.doc> (accessed July 2019)
  21. Landes SD, Peek CW. Death by mental retardation? The influence of ambiguity on death certificate coding error for adults with intellectual disability. *J Intellect Disabil Res* 2013;57(12):1183-1190
  22. Glover, G, Ayub M. How people with learning disabilities die. Improving Health and Lives Learning Disability Observatory, Durham 2010.  
<https://www.gov.uk/government/publications/people-with-learning-disabilities-in-england-2015> (accessed July 2019)
  23. Landes SD, Stevens JD, Turk MA. Obscuring effect of coding developmental disability as the underlying cause of death on mortality trends for adults with developmental disability: a cross-sectional study using US Mortality Data from 2012 to 2016. *BMJ Open* 2019;9:e026614.
  24. Heslop P, Blair PS, Fleming P, et al. The Confidential Inquiry into premature deaths of people with intellectual disabilities in the UK: a population UK: a population-based study. *Lancet* 2014;383(9920):889-895

1  
2  
3  
4  
5  
6  
7  
8  
9  
10  
11  
12  
13  
14  
15  
16  
17  
18  
19  
20  
21  
22  
23  
24  
25  
26  
27  
28  
29  
30  
31  
32  
33  
34  
35  
36  
37  
38  
39  
40  
41  
42  
43  
44  
45  
46

**Figure 1. Forest Plot of age-standardised and sex-specific mortality ratios for pupils with intellectual disabilities**

**Figure 2. Forest plot of cause-specific age-standardised mortality ratios for pupils with intellectual disabilities by ICD 10 chapter for underlying cause of death and for all-contributing factors of death**

*Footnote: Age-standardised mortality ratios (SMRs) & 95% confidence intervals were calculated using 5-year age bands for all ICD 10 chapters with ≥10 deaths. SMRs which were calculated using low numbers (between 10 and 20 deaths) are labelled “U” as unreliable*

For peer review only

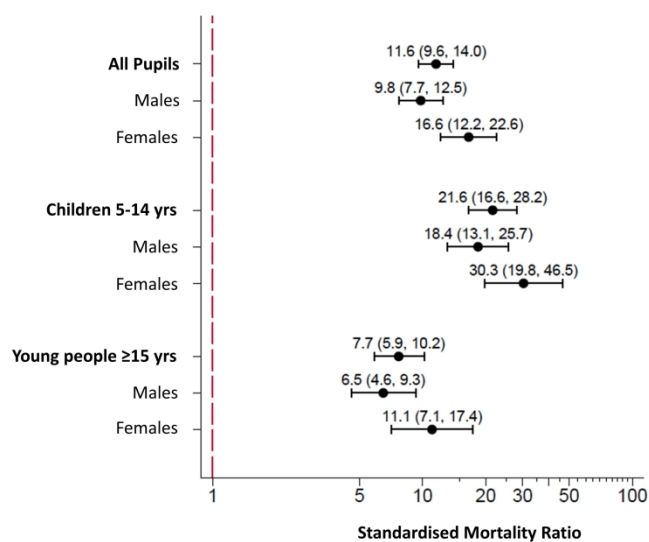

Figure 1. Forest Plot of age-standardised and sex-specific mortality ratios for pupils with intellectual disabilities

338x190mm (300 x 300 DPI)

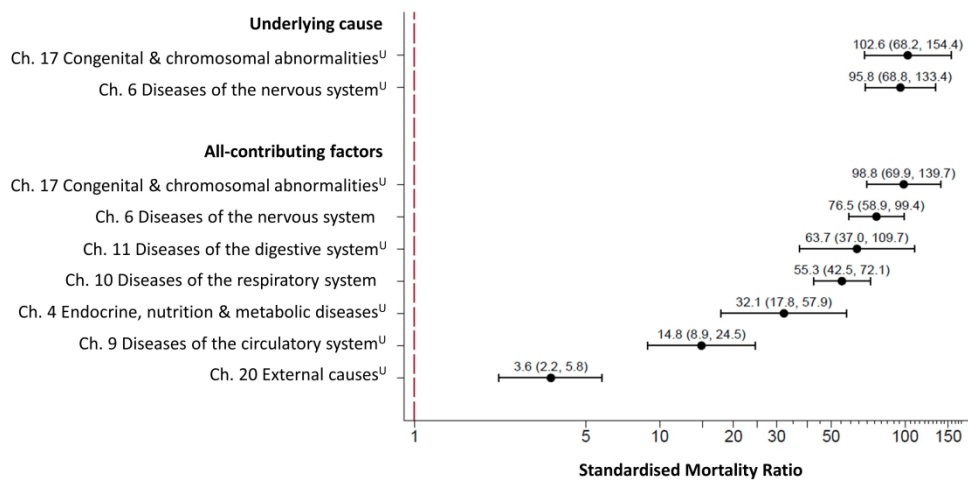

Figure 2. Forest plot of cause-specific age-standardised mortality ratios for pupils with intellectual disabilities by ICD 10 chapter for underlying cause of death and for all-contributing factors of death

338x190mm (300 x 300 DPI)

## Supplementary – Appendix 1 - Reported standardised mortality ratios for children and young people with intellectual disabilities

| Author                          | Country             | SMR overall (95% confidence interval) at all ages                                                                                                                      | Number of deaths of children/young people                                                                | SMR for children/young people                                                                                                                                                                                                                                  |
|---------------------------------|---------------------|------------------------------------------------------------------------------------------------------------------------------------------------------------------------|----------------------------------------------------------------------------------------------------------|----------------------------------------------------------------------------------------------------------------------------------------------------------------------------------------------------------------------------------------------------------------|
| McGuigan et al (1995)[1]        | England             | -                                                                                                                                                                      | 18 aged 0-19 y                                                                                           | 1.7 (0.3, 4.9) for males aged 0-9 y*<br>3.1 (0.6, 9.0) for females aged 0-9 y*<br>17.1 (2.1, 61.8) for males aged 2-14 y*<br>20.7 (2.5, 74.7) for females aged 2-14 y*<br>22.2 (6.1, 56.8) for males aged 7-19 y*<br>34.0 (9.3, 87.1) for females aged 7-19 y* |
| Forsgren et al (1996)[2]        | Sweden              | 2.0 (1.7, 2.3)                                                                                                                                                         | 12 aged 0-19 y                                                                                           | 15.5 (10.2, 23.6) aged 0-19 y                                                                                                                                                                                                                                  |
| Patja et al (2001)[3]           | Finland             | -                                                                                                                                                                      | 50 aged 2-19 y; 29 profound ID, 5 Severe ID, 7 moderate ID, 8 mild ID                                    | Death from disease: 2.6 for males, 1.7 for females aged 2-19 y<br>Accidental death: 0.1 for males, 0.1 for females aged 2-19 y                                                                                                                                 |
| Decouflé & Autry (2002)[4]      | USA                 | -                                                                                                                                                                      | 23 aged 10-20 y                                                                                          | 3.3 (2.1, 5.0) aged 10-19 y<br>1.4 (0.6, 2.9) with mild ID aged 10-19 y<br>8.4 (4.8, 13.6) with severe ID aged 10-19 y                                                                                                                                         |
| Shavelle et al. (2014) [5]      | USA                 | 1.65 for mild and moderate ID<br>1.85 for severe and profound ID                                                                                                       | 59 aged 5-19 y mild and moderate ID<br>7 aged 5-19 y severe and profound ID                              | 1.26** for mild and moderate ID aged 5-19 y<br>8.30** for severe and profound ID aged 5-19 y                                                                                                                                                                   |
| Ouellette-Kuntz et al (2015)[6] | Canada              | 2.5 (2.1, 2.9)                                                                                                                                                         | 11 males aged 0-19 y<br>3 females aged 0-19 y                                                            | 21.6 (10.8, 38.7) for males aged 0-19 y<br>18.1 (3.7, 53.0) for females aged 0-19 y                                                                                                                                                                            |
| Arvio et al (2016)[7]           | Finland             | 2.3 (2.2, 2.4) for mild ID; 2.0 (1.9, 2.1) for males, 2.8 (2.6, 3.0) for females<br>3.4 (3.3, 3.5) for severe ID; 2.6 (2.5, 2.7) for males, 5.2 (5.0, 5.5) for females | 8 with mild ID aged 0-14 y;<br>4 males, 4 females<br>110 with severe ID aged 0-14 y; 42 males, 68 female | 4.2 (1.8, 8.3) with mild ID aged 0-14 y;<br>3.2 (0.9, 8.1) for males, 6.3 (1.7, 16.2) for females<br>13.3 (10.9, -) with severe ID aged 0-14 y;<br>8.2 (5.9, 11.1) for males, 21.4 (16.6, 27.1) for females                                                    |
| McCarron et al (2015)[8]        | Republic of Ireland | 3.9 (3.7, 4.0)                                                                                                                                                         | 272 aged 0-19 y                                                                                          | 6.9 (5.9, 7.5) aged 0-19 y                                                                                                                                                                                                                                     |
| Lauer et al (2015) [9]          | USA                 | 1.19                                                                                                                                                                   | 58 age 18-24 y                                                                                           | 5.9** aged 18-24 y                                                                                                                                                                                                                                             |
| Glover et al (2017)[10]         | England             | 3.2 (2.9, 3.4)                                                                                                                                                         | 33 aged 0-17 y                                                                                           | 30.4 (18.3, 47.5) aged 0-9 y<br>17.3 (9.4, 29.0) aged 10-17 y                                                                                                                                                                                                  |
| Trollor et al (2017) [11]       | Australia           | 1.3 (1.2-1.5)                                                                                                                                                          | aged 20-24 y not provided                                                                                | 4.5** aged 20-24 y**                                                                                                                                                                                                                                           |
| Bourke et al (2017)[12]         | Australia           | -                                                                                                                                                                      | 326 aged 1-27 y                                                                                          | aHR=6.0 (4.8, 7.6) aged 1-5 y<br>aHR=12.6 (9.0, 17.7) aged 6-10 y<br>aHR=4.9 (3.9, 6.1) aged 11-25 y                                                                                                                                                           |

aHR=adjusted hazard ratio; ID=intellectual disabilities; SMR=standardised mortality ratio; y=years; \*by individual birth cohorts \*\*mortality ratio calculated from age-specific mortality rates

## Supplementary References

1. McGuigan SM, Hollins S, Attard M. Age-specific standardized mortality rates in people with learning disability. *J Intellect Disabil Res* 1995;39(6):527-531
2. Forsgren L, Edvinsson SO, Nystrom L, et al. Influence of epilepsy on mortality in mental retardation: An epidemiologic study. *Epilepsia* 1996;37(10):956-963.
3. Patja K, Mölsä P, Iivanainen M. Cause-specific mortality of people with intellectual disability in a population-based, 35-year follow-up study. *J Intellect Disabil Res* 2001;45:30-40
4. Decouflé P, Autry A. Increased mortality in children and adolescents with developmental disabilities. *Paediatr Perinat Epidemiol* 2002;16(4):375-382
5. Shavelle RM, Sweeney LH, Brooks JC. Comparative Mortality of Persons With Intellectual Disability in California: An Update (2000-2010) *J Insur Med* 2014; 44(3):158-63
6. Ouellette-Kuntz H, Shoostari S, Balogh R, et al. Understanding information about mortality among people with intellectual and developmental disabilities in Canada. *J Appl Res Intellect Disabil* 2015;28(5):423-435
7. Arvio M, Salokivi T, Tiitinen A, et al. Mortality in individuals with intellectual disabilities in Finland. *Brain Behav* 2016;6(2):1-4.
8. McCarron M, Carroll R, Kelly C, et al. Mortality rates in the general Irish population compared to those with an intellectual disability from 2003 to 2012. *J Appl Res Intellect Disabil* 2015;28(5):406-413
9. Lauer E, McCallion P. Mortality of People with Intellectual and Developmental Disabilities from Select US State Disability Service Systems and Medical Claims Data *J Appl Res Intellect Disabil* 2015;28:394-405
10. Glover G, Williams R, Heslop P, et al. Mortality in people with intellectual disabilities in England. *J Intellect Disabil Res* 2017;61(1):62-74
11. Trollor J, Srasuebku P, Xu H, et al. Cause of death and potentially avoidable deaths in Australian adults with intellectual disability using retrospective linked data. *BMJ Open* 2017;7:e013489.
12. Bourke J, Nembhard WN, Wong K, et al. Twenty-Five Year Survival of Children with Intellectual Disability in Western Australia. *J Pediatr* 2017;188:232-239.e2.

**Supplementary – Appendix 2. Kaplan-Meier survival estimates for pupils with and without intellectual disabilities**

For peer review only

1  
2  
3  
4  
5  
6  
7  
8  
9  
10  
11  
12  
13  
14  
15  
16  
17  
18  
19  
20  
21  
22  
23  
24  
25  
26  
27  
28  
29  
30  
31  
32  
33  
34  
35  
36  
37  
38  
39  
40  
41  
42  
43  
44  
45  
46

1  
2  
3  
4  
5  
6  
7  
8  
9  
10  
11  
12  
13  
14  
15  
16  
17  
18  
19  
20  
21  
22  
23  
24  
25  
26  
27  
28  
29  
30  
31  
32  
33  
34  
35  
36  
37  
38  
39  
40  
41  
42  
43  
44  
45  
46  
47  
48  
49  
50  
51  
52  
53  
54  
55  
56  
57  
58  
59  
60

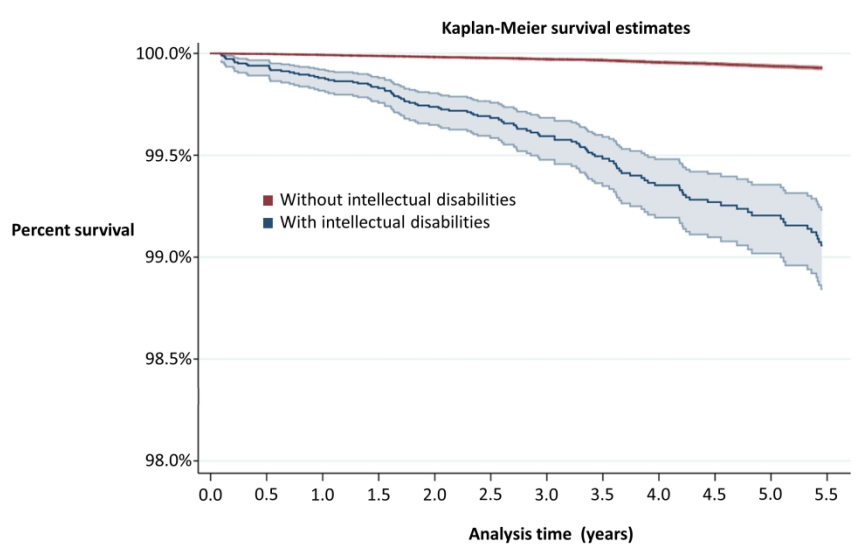

338x190mm (300 x 300 DPI)



STROBE Statement—Checklist of items that should be included in reports of *cohort studies*

|                              | Item No | Recommendation                                                                                                                                                                                                                                                                                                         | Page No |
|------------------------------|---------|------------------------------------------------------------------------------------------------------------------------------------------------------------------------------------------------------------------------------------------------------------------------------------------------------------------------|---------|
| <b>Title and abstract</b>    | 1       | (a) Indicate the study's design with a commonly used term in the title or the abstract<br>(b) Provide in the abstract an informative and balanced summary of what was done and what was found                                                                                                                          | 1<br>1  |
| <b>Introduction</b>          |         |                                                                                                                                                                                                                                                                                                                        |         |
| Background/rationale         | 2       | Explain the scientific background and rationale for the investigation being reported                                                                                                                                                                                                                                   | 3       |
| Objectives                   | 3       | State specific objectives, including any prespecified hypotheses                                                                                                                                                                                                                                                       | 4       |
| <b>Methods</b>               |         |                                                                                                                                                                                                                                                                                                                        |         |
| Study design                 | 4       | Present key elements of study design early in the paper                                                                                                                                                                                                                                                                | 5       |
| Setting                      | 5       | Describe the setting, locations, and relevant dates, including periods of recruitment, exposure, follow-up, and data collection                                                                                                                                                                                        | 5       |
| Participants                 | 6       | (a) Give the eligibility criteria, and the sources and methods of selection of participants. Describe methods of follow-up<br>(b) For matched studies, give matching criteria and number of exposed and unexposed                                                                                                      | 5<br>na |
| Variables                    | 7       | Clearly define all outcomes, exposures, predictors, potential confounders, and effect modifiers. Give diagnostic criteria, if applicable                                                                                                                                                                               | 5       |
| Data sources/<br>measurement | 8*      | For each variable of interest, give sources of data and details of methods of assessment (measurement). Describe comparability of assessment methods if there is more than one group                                                                                                                                   | 6       |
| Bias                         | 9       | Describe any efforts to address potential sources of bias                                                                                                                                                                                                                                                              | 7       |
| Study size                   | 10      | Explain how the study size was arrived at                                                                                                                                                                                                                                                                              | 5       |
| Quantitative variables       | 11      | Explain how quantitative variables were handled in the analyses. If applicable, describe which groupings were chosen and why                                                                                                                                                                                           | 6       |
| Statistical methods          | 12      | (a) Describe all statistical methods, including those used to control for confounding<br>(b) Describe any methods used to examine subgroups and interactions<br>(c) Explain how missing data were addressed<br>(d) If applicable, explain how loss to follow-up was addressed<br>(e) Describe any sensitivity analyses | 6       |
| <b>Results</b>               |         |                                                                                                                                                                                                                                                                                                                        |         |
| Participants                 | 13*     | (a) Report numbers of individuals at each stage of study—eg numbers potentially eligible, examined for eligibility, confirmed eligible, included in the study, completing follow-up, and analysed<br>(b) Give reasons for non-participation at each stage<br>(c) Consider use of a flow diagram                        | 8       |
| Descriptive data             | 14*     | (a) Give characteristics of study participants (eg demographic, clinical, social) and information on exposures and potential confounders<br>(b) Indicate number of participants with missing data for each variable of interest<br>(c) Summarise follow-up time (eg, average and total amount)                         | 8       |
| Outcome data                 | 15*     | Report numbers of outcome events or summary measures over time                                                                                                                                                                                                                                                         | 10      |

|    |                          |    |                                                                                                                                                                                                              |    |
|----|--------------------------|----|--------------------------------------------------------------------------------------------------------------------------------------------------------------------------------------------------------------|----|
| 1  | Main results             | 16 | (a) Give unadjusted estimates and, if applicable, confounder-adjusted estimates and their precision (eg, 95% confidence interval). Make clear which confounders were adjusted for and why they were included | 10 |
| 2  |                          |    | (b) Report category boundaries when continuous variables were categorized                                                                                                                                    |    |
| 3  |                          |    | (c) If relevant, consider translating estimates of relative risk into absolute risk for a meaningful time period                                                                                             |    |
| 4  |                          |    |                                                                                                                                                                                                              |    |
| 5  |                          |    |                                                                                                                                                                                                              |    |
| 6  |                          |    |                                                                                                                                                                                                              |    |
| 7  |                          |    |                                                                                                                                                                                                              |    |
| 8  |                          |    |                                                                                                                                                                                                              |    |
| 9  | Other analyses           | 17 | Report other analyses done—eg analyses of subgroups and interactions, and sensitivity analyses                                                                                                               | 16 |
| 10 |                          |    |                                                                                                                                                                                                              |    |
| 11 | <b>Discussion</b>        |    |                                                                                                                                                                                                              |    |
| 12 |                          |    |                                                                                                                                                                                                              |    |
| 13 | Key results              | 18 | Summarise key results with reference to study objectives                                                                                                                                                     | 17 |
| 14 | Limitations              | 19 | Discuss limitations of the study, taking into account sources of potential bias or imprecision. Discuss both direction and magnitude of any potential bias                                                   | 19 |
| 15 |                          |    |                                                                                                                                                                                                              |    |
| 16 | Interpretation           | 20 | Give a cautious overall interpretation of results considering objectives, limitations, multiplicity of analyses, results from similar studies, and other relevant evidence                                   | 20 |
| 17 |                          |    |                                                                                                                                                                                                              |    |
| 18 |                          |    |                                                                                                                                                                                                              |    |
| 19 | Generalisability         | 21 | Discuss the generalisability (external validity) of the study results                                                                                                                                        | 18 |
| 20 |                          |    |                                                                                                                                                                                                              |    |
| 21 | <b>Other information</b> |    |                                                                                                                                                                                                              |    |
| 22 | Funding                  | 22 | Give the source of funding and the role of the funders for the present study and, if applicable, for the original study on which the present article is based                                                | 21 |
| 23 |                          |    |                                                                                                                                                                                                              |    |
| 24 |                          |    |                                                                                                                                                                                                              |    |

25  
26 \*Give information separately for exposed and unexposed groups.

27  
28 **Note:** An Explanation and Elaboration article discusses each checklist item and gives methodological background and  
29 published examples of transparent reporting. The STROBE checklist is best used in conjunction with this article (freely  
30 available on the Web sites of PLoS Medicine at <http://www.plosmedicine.org/>, Annals of Internal Medicine at  
31 <http://www.annals.org/>, and Epidemiology at <http://www.epidem.com/>). Information on the STROBE Initiative is  
32 available at <http://www.strobe-statement.org>.  
33  
34  
35  
36  
37  
38  
39  
40  
41  
42  
43  
44  
45  
46  
47  
48  
49  
50  
51  
52  
53  
54  
55  
56  
57  
58  
59  
60
