# Supplementary material for: Rates and causes of mortality among children and young people with and without intellectual disabilities in Scotland: a record linkage cohort study of 796 190 school children
Source: PubMed Central journal article supplement (PMC7418667; doi:10.1136/bmjopen-2019-034077), 2020-08-09
Supplement: bmjopen-2019-034077supp001.pdf [file bmjopen-2019-034077supp001.pdf]

## Supplementary – Appendix 1 - Reported standardised mortality ratios for children and young people with intellectual disabilities

| Author                          | Country             | SMR overall (95% confidence interval) at all ages                                                                                                                      | Number of deaths of children/young people                                                                | SMR for children/young people                                                                                                                                                                                                                                  |
|---------------------------------|---------------------|------------------------------------------------------------------------------------------------------------------------------------------------------------------------|----------------------------------------------------------------------------------------------------------|----------------------------------------------------------------------------------------------------------------------------------------------------------------------------------------------------------------------------------------------------------------|
| McGuigan et al (1995)[1]        | England             | -                                                                                                                                                                      | 18 aged 0-19 y                                                                                           | 1.7 (0.3, 4.9) for males aged 0-9 y*<br>3.1 (0.6, 9.0) for females aged 0-9 y*<br>17.1 (2.1, 61.8) for males aged 2-14 y*<br>20.7 (2.5, 74.7) for females aged 2-14 y*<br>22.2 (6.1, 56.8) for males aged 7-19 y*<br>34.0 (9.3, 87.1) for females aged 7-19 y* |
| Forsgren et al (1996)[2]        | Sweden              | 2.0 (1.7, 2.3)                                                                                                                                                         | 12 aged 0-19 y                                                                                           | 15.5 (10.2, 23.6) aged 0-19 y                                                                                                                                                                                                                                  |
| Patja et al (2001)[3]           | Finland             | -                                                                                                                                                                      | 50 aged 2-19 y; 29 profound ID, 5 Severe ID, 7 moderate ID, 8 mild ID                                    | Death from disease: 2.6 for males, 1.7 for females aged 2-19 y<br>Accidental death: 0.1 for males, 0.1 for females aged 2-19 y                                                                                                                                 |
| Decouflé & Autry (2002)[4]      | USA                 | -                                                                                                                                                                      | 23 aged 10-20 y                                                                                          | 3.3 (2.1, 5.0) aged 10-19 y<br>1.4 (0.6, 2.9) with mild ID aged 10-19 y<br>8.4 (4.8, 13.6) with severe ID aged 10-19 y                                                                                                                                         |
| Shavelle et al. (2014) [5]      | USA                 | 1.65 for mild and moderate ID<br>1.85 for severe and profound ID                                                                                                       | 59 aged 5-19 y mild and moderate ID<br>7 aged 5-19 y severe and profound ID                              | 1.26** for mild and moderate ID aged 5-19 y<br>8.30** for severe and profound ID aged 5-19 y                                                                                                                                                                   |
| Ouellette-Kuntz et al (2015)[6] | Canada              | 2.5 (2.1, 2.9)                                                                                                                                                         | 11 males aged 0-19 y<br>3 females aged 0-19 y                                                            | 21.6 (10.8, 38.7) for males aged 0-19 y<br>18.1 (3.7, 53.0) for females aged 0-19 y                                                                                                                                                                            |
| Arvio et al (2016)[7]           | Finland             | 2.3 (2.2, 2.4) for mild ID; 2.0 (1.9, 2.1) for males, 2.8 (2.6, 3.0) for females<br>3.4 (3.3, 3.5) for severe ID; 2.6 (2.5, 2.7) for males, 5.2 (5.0, 5.5) for females | 8 with mild ID aged 0-14 y;<br>4 males, 4 females<br>110 with severe ID aged 0-14 y; 42 males, 68 female | 4.2 (1.8, 8.3) with mild ID aged 0-14 y;<br>3.2 (0.9, 8.1) for males, 6.3 (1.7, 16.2) for females<br>13.3 (10.9, -) with severe ID aged 0-14 y;<br>8.2 (5.9, 11.1) for males, 21.4 (16.6, 27.1) for females                                                    |
| McCarron et al (2015)[8]        | Republic of Ireland | 3.9 (3.7, 4.0)                                                                                                                                                         | 272 aged 0-19 y                                                                                          | 6.9 (5.9, 7.5) aged 0-19 y                                                                                                                                                                                                                                     |
| Lauer et al (2015) [9]          | USA                 | 1.19                                                                                                                                                                   | 58 age 18-24 y                                                                                           | 5.9** aged 18-24 y                                                                                                                                                                                                                                             |
| Glover et al (2017)[10]         | England             | 3.2 (2.9, 3.4)                                                                                                                                                         | 33 aged 0-17 y                                                                                           | 30.4 (18.3, 47.5) aged 0-9 y<br>17.3 (9.4, 29.0) aged 10-17 y                                                                                                                                                                                                  |
| Trollor et al (2017) [11]       | Australia           | 1.3 (1.2-1.5)                                                                                                                                                          | aged 20-24 y not provided                                                                                | 4.5** aged 20-24 y**                                                                                                                                                                                                                                           |
| Bourke et al (2017)[12]         | Australia           | -                                                                                                                                                                      | 326 aged 1-27 y                                                                                          | aHR=6.0 (4.8, 7.6) aged 1-5 y<br>aHR=12.6 (9.0, 17.7) aged 6-10 y<br>aHR=4.9 (3.9, 6.1) aged 11-25 y                                                                                                                                                           |

aHR=adjusted hazard ratio; ID=intellectual disabilities; SMR=standardised mortality ratio; y=years; \*by individual birth cohorts \*\*mortality ratio calculated from age-specific mortality rates

### Supplementary References

1. McGuigan SM, Hollins S, Attard M. Age-specific standardized mortality rates in people with learning disability. *J Intellect Disabil Res* 1995;39(6):527-531
2. Forsgren L, Edvinsson SO, Nystrom L, et al. Influence of epilepsy on mortality in mental retardation: An epidemiologic study. *Epilepsia* 1996;37(10):956-963.
3. Patja K, Mölsä P, Iivanainen M. Cause-specific mortality of people with intellectual disability in a population-based, 35-year follow-up study. *J Intellect Disabil Res* 2001;45:30-40
4. Decouflé P, Autry A. Increased mortality in children and adolescents with developmental disabilities. *Paediatr Perinat Epidemiol* 2002;16(4):375-382
5. Shavelle RM, Sweeney LH, Brooks JC. Comparative Mortality of Persons With Intellectual Disability in California: An Update (2000-2010) *J Insur Med* 2014; 44(3):158-63
6. Ouellette-Kuntz H, Shooshtari S, Balogh R, et al. Understanding information about mortality among people with intellectual and developmental disabilities in Canada. *J Appl Res Intellect Disabil* 2015;28(5):423-435
7. Arvio M, Salokivi T, Tiitinen A, et al. Mortality in individuals with intellectual disabilities in Finland. *Brain Behav* 2016;6(2):1-4.
8. McCarron M, Carroll R, Kelly C, et al. Mortality rates in the general Irish population compared to those with an intellectual disability from 2003 to 2012. *J Appl Res Intellect Disabil* 2015;28(5):406-413
9. Lauer E, McCallion P. Mortality of People with Intellectual and Developmental Disabilities from Select US State Disability Service Systems and Medical Claims Data *J Appl Res Intellect Disabil* 2015;28:394-405
10. Glover G, Williams R, Heslop P, et al. Mortality in people with intellectual disabilities in England. *J Intellect Disabil Res* 2017;61(1):62-74
11. Trollor J, Srasuebkul P, Xu H, et al. Cause of death and potentially avoidable deaths in Australian adults with intellectual disability using retrospective linked data. *BMJ Open* 2017;7:e013489.
12. Bourke J, Nembhard WN, Wong K, et al. Twenty-Five Year Survival of Children with Intellectual Disability in Western Australia. *J Pediatr* 2017;188:232-239.e2.

**Supplementary – Appendix 2. Kaplan-Meier survival estimates for pupils with and without intellectual disabilities**
