# Supplementary material for: Rates and causes of mortality among children and young people with and without intellectual disabilities in Scotland: a record linkage cohort study of 796 190 school children
Source: PubMed Central journal article supplement (PMC7418667; doi:10.1136/bmjopen-2019-034077), 2020-08-09

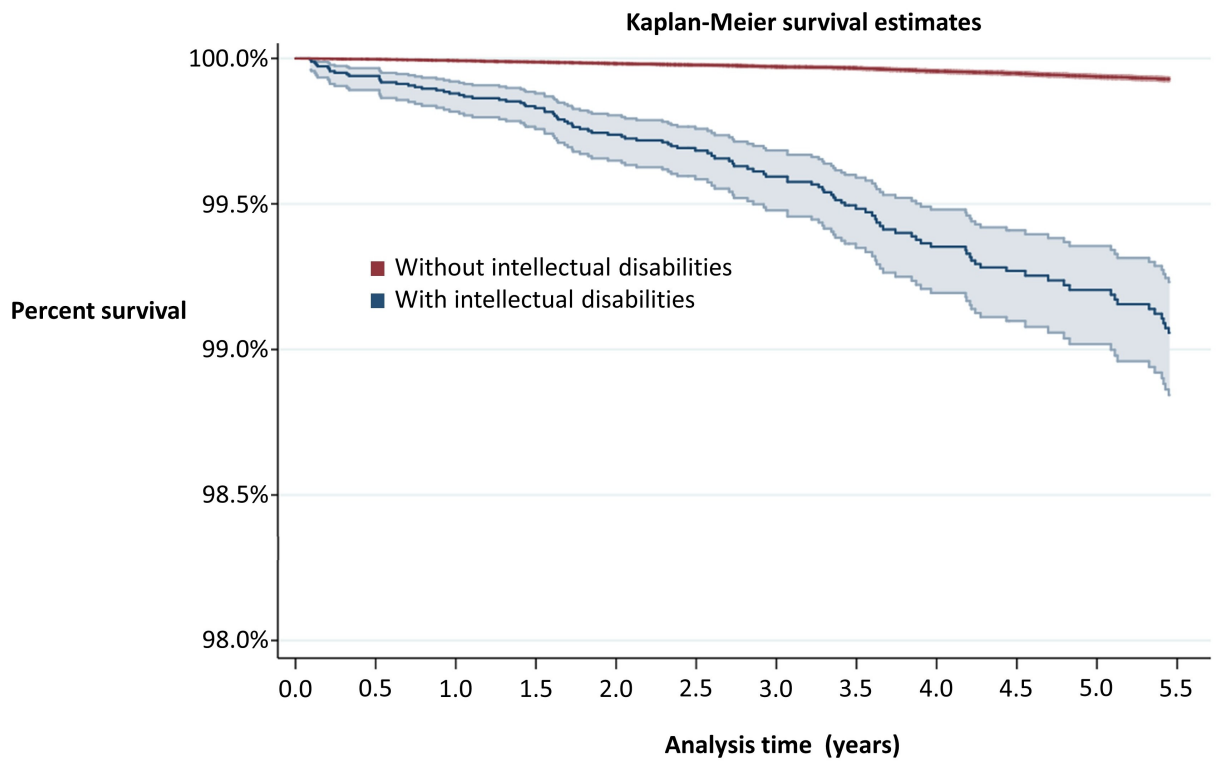

Supplement: bmjopen-2019-034077supp002.pdf [file bmjopen-2019-034077supp002.pdf]
